# Supplementary material for: Distributed Polarizability Model for Covalently Bonded Fullerene Nanoaggregates: Origins of Polarizability Exaltation
Source: MDPI journal article supplement (doi:10.3390/nano12244404), 2022-12-09
Supplement: s1 [file s1]

**Supplementary Materials**

to the article

**Distributed Polarizability Model for Covalently-Bonded Fullerene Nanoaggregates: Origins of Polarizability Exaltation**

**Denis Sh. Sabirov <sup>1,\*</sup>, Alina A. Tukhbatullina <sup>1</sup>**

<sup>1</sup> Laboratory of Mathematical Chemistry, Institute of Petrochemistry and Catalysis UFRC RAS; ink@anrb.ru

\* Correspondence: diozno@mail.ru; Tel.: +7 (347) 284 27 50

**Table S1. Cartesian coordinates of C<sub>60</sub> (hereinafter, in angstroms)**

|           |           |           |
|-----------|-----------|-----------|
| 2.869482  | 2.084958  | -0.161739 |
| 1.848463  | 3.031423  | -0.039038 |
| 3.194591  | 1.218253  | 0.957745  |
| 1.112204  | 3.148000  | 1.207773  |
| 2.486219  | 1.330519  | 2.157332  |
| 1.424719  | 2.313820  | 2.284639  |
| 2.997153  | 1.308530  | -1.382756 |
| 0.914857  | 3.238762  | -1.132689 |
| 2.098775  | 1.507890  | -2.434721 |
| 1.037610  | 2.491589  | -2.307376 |
| -0.276324 | 3.426904  | 0.884637  |
| -0.398401 | 3.483129  | -0.561801 |
| -1.298912 | 2.861508  | 1.650915  |
| -1.538702 | 2.971088  | -1.187206 |
| -2.484322 | 2.330302  | 1.000811  |
| -2.601839 | 2.383686  | -0.390740 |
| -2.892210 | 1.134852  | 1.718403  |
| -3.131638 | 1.244078  | -1.119402 |
| -3.401759 | 0.038241  | 1.017768  |
| -3.523619 | 0.093955  | -0.428765 |
| -2.997153 | -1.308530 | 1.382756  |
| -3.194591 | -1.218253 | -0.957745 |
| -2.869482 | -2.084958 | 0.161739  |
| 3.523619  | -0.093955 | 0.428765  |
| 3.401759  | -0.038241 | -1.017768 |
| 3.131638  | -1.244078 | 1.119402  |
| 2.892210  | -1.134852 | -1.718403 |
| 2.601839  | -2.383686 | 0.390740  |
| 2.484322  | -2.330302 | -1.000811 |
| 1.538702  | -2.971088 | 1.187206  |
| 1.298912  | -2.861508 | -1.650915 |
| 0.398401  | -3.483129 | 0.561801  |
| 0.276324  | -3.426904 | -0.884637 |
| -0.914857 | -3.238762 | 1.132689  |
| -1.112204 | -3.148000 | -1.207773 |
| -1.848463 | -3.031423 | 0.039038  |
| -2.098775 | -1.507890 | 2.434721  |
| -1.037610 | -2.491589 | 2.307376  |
| -1.570043 | -0.368014 | 3.163613  |
| 0.147607  | -1.959120 | 2.957035  |
| -0.181444 | -0.646925 | 3.486360  |
| 0.765693  | 0.379997  | 3.446395  |
| 2.079088  | 0.135243  | 2.875420  |
| 2.395784  | -1.127316 | 2.366549  |

|           |           |           |
|-----------|-----------|-----------|
| -1.958897 | 0.927551  | 2.812075  |
| 0.361556  | 1.726615  | 3.081663  |
| -0.974397 | 1.994926  | 2.770776  |
| 1.410830  | -2.194337 | 2.407801  |
| -1.424719 | -2.313820 | -2.284639 |
| -2.486219 | -1.330519 | -2.157332 |
| -0.361556 | -1.726615 | -3.081663 |
| -2.079088 | -0.135243 | -2.875420 |
| -0.765693 | -0.379997 | -3.446395 |
| 0.181444  | 0.646925  | -3.486360 |
| 1.570043  | 0.368014  | -3.163613 |
| 1.958897  | -0.927551 | -2.812075 |
| 0.974397  | -1.994926 | -2.770776 |
| -0.147607 | 1.959120  | -2.957035 |
| -1.410830 | 2.194337  | -2.407801 |
| -2.395784 | 1.127316  | -2.366549 |

**Table S2. Cartesian coordinates of [2+2]-(C<sub>60</sub>)<sub>2</sub>**

|           |           |           |
|-----------|-----------|-----------|
| -5.282303 | 2.312907  | 2.598768  |
| -5.737027 | 3.041139  | 1.425645  |
| -6.866704 | 2.604683  | 0.726672  |
| -7.587023 | 1.426989  | 1.174626  |
| -7.150272 | 0.727990  | 2.304741  |
| -5.977438 | 1.176856  | 3.026551  |
| -3.832132 | 2.315485  | 2.592072  |
| -3.390657 | 3.040085  | 1.425440  |
| -4.564654 | 3.492288  | 0.698037  |
| -4.564682 | 3.492232  | -0.698404 |
| -6.866732 | 2.604604  | -0.726875 |
| -8.033364 | 0.699105  | 0.000022  |
| -8.033371 | -0.699080 | 0.000094  |
| -7.587038 | -1.426841 | 1.174778  |
| -7.150281 | -0.727726 | 2.304819  |
| -5.977450 | -1.176529 | 3.026677  |
| -5.246419 | 0.000183  | 3.467038  |
| -3.850052 | 0.000177  | 3.445662  |
| -3.125653 | 1.176123  | 3.000810  |
| -2.263263 | 2.590385  | 0.725549  |
| -1.511878 | 1.450424  | 1.176156  |
| -1.951748 | 0.740292  | 2.276862  |
| -1.951750 | -0.740081 | 2.276948  |
| -3.125661 | -1.175823 | 3.000941  |
| -3.832155 | -2.315224 | 2.592328  |
| -5.282330 | -2.312633 | 2.599016  |
| -5.737052 | -3.040979 | 1.425963  |

|           |           |           |
|-----------|-----------|-----------|
| -6.866727 | -2.604587 | 0.726948  |
| -7.587060 | 1.426862  | -1.174676 |
| -5.282414 | -2.312912 | -2.598754 |
| -5.977549 | -1.176854 | -3.026512 |
| -5.246531 | -0.000178 | -3.467012 |
| -3.850165 | -0.000166 | -3.445697 |
| -3.125765 | -1.176129 | -3.000879 |
| -3.390732 | -3.040081 | -1.425486 |
| -4.564701 | -3.492278 | -0.698043 |
| -5.737100 | -3.041129 | -1.425612 |
| -6.866748 | -2.604661 | -0.726600 |
| -7.587072 | -1.426965 | -1.174526 |
| -7.150346 | -0.727972 | -2.304655 |
| -5.977543 | 1.176541  | -3.026629 |
| -5.282395 | 2.312634  | -2.598986 |
| -3.832209 | 2.315221  | -2.592337 |
| -3.125746 | 1.175812  | -3.000934 |
| -1.951821 | 0.739981  | -2.276954 |
| -1.951842 | -0.740330 | -2.276970 |
| -1.511935 | -1.450465 | -1.176250 |
| -2.263301 | -2.590423 | -0.725625 |
| -4.564680 | -3.492209 | 0.698399  |
| -3.390692 | -3.039932 | 1.425762  |
| -2.263293 | -2.590343 | 0.725825  |
| -1.511912 | -1.450328 | 1.176298  |
| -0.798600 | -0.800507 | -0.000025 |
| -0.798572 | 0.800486  | -0.000121 |
| -1.511904 | 1.450352  | -1.176433 |
| -2.263289 | 2.590352  | -0.725903 |
| -3.390713 | 3.039946  | -1.425790 |
| -7.150346 | 0.727746  | -2.304731 |
| -5.737076 | 3.040990  | -1.425928 |
| -3.832233 | -2.315503 | -2.592122 |
| 7.587037  | -1.426779 | 1.174850  |
| 8.033373  | -0.699075 | 0.000132  |
| 8.033358  | 0.699110  | -0.000016 |
| 7.587016  | 1.427051  | 1.174552  |
| 7.150260  | 0.728108  | 2.304698  |
| 7.150275  | -0.727607 | 2.304854  |
| 6.866731  | -2.604550 | 0.727082  |
| 6.866757  | -2.604702 | -0.726467 |
| 7.587075  | -1.427019 | -1.174451 |
| 7.150353  | -0.728088 | -2.304618 |
| 7.587059  | 1.426809  | -1.174749 |
| 6.866699  | 2.604724  | 0.726542  |
| 5.737022  | 3.041217  | 1.425493  |

|          |           |           |
|----------|-----------|-----------|
| 5.282301 | 2.313047  | 2.598658  |
| 5.977432 | 1.177013  | 3.026491  |
| 5.246414 | 0.000360  | 3.467039  |
| 5.977449 | -1.176375 | 3.026737  |
| 5.282327 | -2.312502 | 2.599133  |
| 5.737059 | -3.040909 | 1.426123  |
| 5.737105 | -3.041199 | -1.425453 |
| 4.564711 | -3.492319 | -0.697862 |
| 4.564691 | -3.492177 | 0.698576  |
| 3.390695 | -3.039856 | 1.425906  |
| 3.832156 | -2.315091 | 2.592443  |
| 3.125653 | -1.175671 | 3.000990  |
| 3.850045 | 0.000354  | 3.445664  |
| 3.125645 | 1.176282  | 3.000765  |
| 3.832123 | 2.315630  | 2.591974  |
| 6.866726 | 2.604576  | -0.727005 |
| 2.263289 | 2.590268  | -0.726031 |
| 3.390712 | 3.039843  | -1.425948 |
| 3.832215 | 2.315085  | -2.592466 |
| 3.125746 | 1.175653  | -3.001038 |
| 1.951806 | 0.739938  | -2.277079 |
| 0.798594 | 0.800474  | -0.000131 |
| 1.511898 | 1.450486  | 1.176084  |
| 2.263279 | 2.590420  | 0.725418  |
| 3.390654 | 3.040162  | 1.425297  |
| 4.564648 | 3.492322  | 0.697862  |
| 4.564674 | 3.492184  | -0.698579 |
| 5.282388 | 2.312506  | -2.599108 |
| 5.977541 | 1.176390  | -3.026689 |
| 5.246529 | -0.000347 | -3.467010 |
| 3.850163 | -0.000363 | -3.445687 |
| 3.125757 | -1.176295 | -3.000808 |
| 1.951820 | -0.740445 | -2.276928 |
| 1.511948 | -1.450523 | -1.176181 |
| 0.798599 | -0.800520 | 0.000008  |
| 1.951742 | 0.740416  | 2.276846  |
| 1.951741 | -0.739961 | 2.276991  |
| 1.511894 | -1.450263 | 1.176376  |
| 2.263295 | -2.590295 | 0.725960  |
| 2.263323 | -2.590450 | -0.725493 |
| 3.390742 | -3.040160 | -1.425331 |
| 3.832243 | -2.315632 | -2.591993 |
| 5.282419 | -2.313038 | -2.598635 |
| 5.977549 | -1.176996 | -3.026439 |
| 5.737070 | 3.040922  | -1.426081 |
| 7.150350 | 0.727631  | -2.304770 |

|          |          |           |
|----------|----------|-----------|
| 1.511927 | 1.450228 | -1.176475 |
|----------|----------|-----------|

**Table S3. Cartesian coordinates of tubular fullerene C<sub>120</sub>**

|           |           |           |
|-----------|-----------|-----------|
| 4.287632  | 2.611580  | -2.258730 |
| 4.287504  | 1.459599  | -3.128746 |
| 3.083204  | 0.791055  | -3.414215 |
| 1.847867  | 2.613654  | -2.271607 |
| 1.847820  | 1.471608  | -3.133833 |
| 0.613118  | 0.783685  | -3.358458 |
| -0.613103 | 2.608840  | -2.256837 |
| -0.613063 | 1.458763  | -3.125169 |
| -1.847774 | 0.778972  | -3.373315 |
| -3.083302 | 2.647290  | -2.297419 |
| -3.083190 | 1.487347  | -3.173614 |
| -4.287440 | 0.785067  | -3.362018 |
| -5.524561 | 2.328539  | -1.925896 |
| -5.524450 | 1.216855  | -2.765717 |
| -4.287664 | 3.020422  | -1.673508 |
| -1.847845 | 3.033547  | -1.670820 |
| 0.613132  | 3.018089  | -1.671367 |
| 3.083371  | 3.069315  | -1.693611 |
| 5.524560  | 2.610126  | -1.522332 |
| 6.301928  | 1.458333  | -1.929982 |
| 5.524465  | 0.751562  | -2.926561 |
| 5.524557  | -0.641424 | -2.952878 |
| 3.083229  | -0.662355 | -3.441669 |
| 0.613081  | -0.657151 | -3.385832 |
| -1.847787 | -0.651779 | -3.400424 |
| -4.287452 | -0.658282 | -3.389204 |
| -5.524439 | -1.112118 | -2.809431 |
| -6.301948 | 0.045427  | -2.418711 |
| 4.287585  | -1.341349 | -3.181719 |
| 1.847813  | -1.353080 | -3.187231 |
| -0.613120 | -1.340532 | -3.177946 |
| -3.083213 | -1.367141 | -3.227180 |
| -5.524573 | -2.254552 | -2.011924 |
| -3.083300 | -2.559060 | -2.395003 |
| -0.613125 | -2.522217 | -2.353038 |
| 1.847847  | -2.526386 | -2.367984 |
| 4.287606  | -2.524938 | -2.355140 |
| 3.083328  | -3.003235 | -1.807449 |
| 0.613103  | -2.952975 | -1.783341 |
| -1.847889 | -2.968406 | -1.783274 |
| -4.287659 | -2.955379 | -1.785588 |
| 5.524550  | -2.551222 | -1.619259 |
| 5.524580  | -3.006573 | -0.302574 |

|           |           |           |
|-----------|-----------|-----------|
| 4.287710  | -3.440735 | 0.292397  |
| 3.083380  | -3.478554 | -0.433679 |
| 0.613125  | -3.424241 | -0.421478 |
| -1.847922 | -3.436450 | -0.430992 |
| -4.287734 | -3.427345 | -0.421300 |
| -3.083426 | -3.492579 | 0.302877  |
| -0.613137 | -3.437769 | 0.292707  |
| 1.847873  | -3.450256 | 0.301777  |
| 4.287665  | -3.020410 | 1.673501  |
| 1.847849  | -3.033521 | 1.670803  |
| -0.613141 | -3.018088 | 1.671369  |
| -3.083382 | -3.069325 | 1.693623  |
| -5.524655 | -3.015892 | 0.189506  |
| -5.524563 | -2.610118 | 1.522333  |
| -4.287640 | -2.611571 | 2.258729  |
| -1.847877 | -2.613641 | 2.271599  |
| 0.613101  | -2.608870 | 2.256854  |
| 3.083306  | -2.647304 | 2.297432  |
| 5.524566  | -2.328541 | 1.925892  |
| 5.524451  | -1.216853 | 2.765708  |
| 4.287445  | -0.785072 | 3.362014  |
| 3.083196  | -1.487347 | 3.173602  |
| 1.847773  | -0.778981 | 3.373358  |
| 0.613084  | -1.458763 | 3.125123  |
| -1.847823 | -1.471607 | 3.133841  |
| -4.287508 | -1.459591 | 3.128748  |
| -0.613112 | -0.783700 | 3.358479  |
| -3.083207 | -0.791045 | 3.414209  |
| -6.302118 | -2.286520 | -0.790650 |
| 6.301964  | -1.384989 | -1.983414 |
| 6.302018  | -2.314445 | 0.704255  |
| 4.287452  | 0.658274  | 3.389186  |
| 1.847797  | 0.651773  | 3.400375  |
| -0.613101 | 0.657121  | 3.385814  |
| -3.083236 | 0.662365  | 3.441681  |
| -5.524468 | -0.751554 | 2.926559  |
| -5.524561 | 0.641432  | 2.952884  |
| -4.287591 | 1.341349  | 3.181721  |
| -1.847809 | 1.353086  | 3.187225  |
| 0.613099  | 1.340527  | 3.178004  |
| 3.083212  | 1.367150  | 3.227190  |
| 5.524443  | 1.112120  | 2.809437  |
| 5.524568  | 2.254549  | 2.011921  |
| 3.083306  | 2.559055  | 2.394993  |
| 0.613141  | 2.522149  | 2.353014  |
| -1.847838 | 2.526390  | 2.367979  |
| -4.287609 | 2.524954  | 2.355153  |
| -3.083325 | 3.003221  | 1.807443  |

|           |           |           |
|-----------|-----------|-----------|
| -0.613093 | 2.952964  | 1.783329  |
| 1.847875  | 2.968443  | 1.783303  |
| 4.287662  | 2.955391  | 1.785599  |
| 6.301952  | -0.045424 | 2.418711  |
| -6.301936 | -1.458327 | 1.929986  |
| 5.524656  | 3.015901  | -0.189505 |
| 3.083420  | 3.492587  | -0.302866 |
| 0.613137  | 3.437787  | -0.292708 |
| -1.847870 | 3.450229  | -0.301778 |
| -4.287706 | 3.440727  | -0.292397 |
| 4.287735  | 3.427354  | 0.421305  |
| 1.847916  | 3.436419  | 0.430998  |
| -0.613122 | 3.424244  | 0.421481  |
| -3.083375 | 3.478559  | 0.433681  |
| 7.048611  | 0.744834  | -0.985631 |
| 7.048500  | -0.707296 | -1.012857 |
| 7.048588  | -1.181964 | 0.359725  |
| 7.048665  | -0.023151 | 1.235331  |
| -6.302013 | 2.314445  | -0.704259 |
| -5.524576 | 3.006575  | 0.302572  |
| -6.301962 | 1.384995  | 1.983410  |
| -5.524545 | 2.551226  | 1.619258  |
| -7.048500 | 0.707303  | 1.012855  |
| -7.048609 | -0.744826 | 0.985628  |
| -7.048696 | -1.167752 | -0.403840 |
| -7.048665 | 0.023155  | -1.235334 |
| -7.048583 | 1.181967  | -0.359729 |
| 7.048693  | 1.167755  | 0.403838  |
| 6.302117  | 2.286525  | 0.790648  |

**Table S4. Cartesian coordinates of nanopeanut C<sub>120</sub>**

|           |           |           |
|-----------|-----------|-----------|
| -7.574736 | -0.561011 | 1.312410  |
| -7.574693 | 0.882228  | 1.122130  |
| -6.740919 | 1.471908  | 2.151601  |
| -6.234905 | 0.393336  | 2.983351  |
| -6.740881 | -0.863867 | 2.459452  |
| -5.918216 | -1.998270 | 2.445822  |
| -4.932582 | 0.457342  | 3.469615  |
| -7.574738 | -1.412804 | 0.202766  |
| -7.574703 | 1.417328  | -0.170359 |
| -5.918164 | 2.564010  | 1.844522  |
| -6.740973 | -2.599220 | 0.198797  |
| -5.918245 | -2.879292 | 1.298116  |
| -4.554205 | -1.916646 | 2.933794  |
| -4.086197 | -0.716565 | 3.450837  |
| -4.086119 | 1.586214  | 3.147249  |



|           |           |           |
|-----------|-----------|-----------|
| -4.554079 | 2.611426  | 2.337009  |
| -5.918059 | 3.117365  | 0.507615  |
| -6.740900 | 2.562143  | -0.481609 |
| -7.574762 | -0.855972 | -1.142227 |
| -7.574754 | 0.530962  | -1.325123 |
| -6.235086 | -2.780487 | -1.151124 |
| -4.554214 | -3.329749 | 1.093133  |
| -3.689538 | -2.707730 | 2.078319  |
| -2.739322 | -0.314579 | 3.165833  |
| -4.554050 | 3.499171  | 0.192887  |
| -6.740965 | -1.698096 | -1.977956 |
| -6.740871 | 1.127533  | -2.350502 |
| -6.235022 | 2.387284  | -1.832472 |
| -2.739283 | 1.124062  | 2.976207  |
| -3.689422 | 3.153791  | 1.305764  |
| -2.351596 | 2.707654  | 1.121102  |
| -1.837893 | 1.713682  | 2.074782  |
| -2.351634 | -2.324886 | 1.784428  |
| -1.837980 | -1.117783 | 2.447984  |
| -4.086215 | -3.518880 | -0.199856 |
| -4.932685 | -3.233567 | -1.338693 |
| -5.918056 | -1.119102 | -2.953362 |
| -5.918020 | 0.315373  | -3.142404 |
| -4.932590 | 2.776184  | -2.131008 |
| -4.086114 | 3.346751  | -1.104945 |
| -4.086095 | 1.932458  | -2.947340 |
| -2.739277 | 2.015307  | -2.461510 |
| -2.739275 | 2.898869  | -1.310464 |
| -1.837885 | 2.678870  | -0.256009 |
| -0.618196 | 0.950314  | 1.901153  |
| -0.618213 | 2.016032  | -0.672571 |
| -0.618321 | -0.425597 | 2.082209  |
| -0.618223 | -2.121558 | -0.127493 |
| -1.837901 | -2.653689 | 0.446759  |
| -2.739359 | -3.139563 | -0.514550 |
| -4.086171 | -2.630345 | -2.345854 |
| -2.739302 | -2.584520 | -1.855249 |
| -4.554074 | -1.582606 | -3.126728 |
| -4.554044 | 0.718133  | -3.430028 |
| -3.689437 | -0.446129 | -3.384011 |
| -2.351656 | -0.382975 | -2.905296 |
| -1.837893 | 0.939829  | -2.521393 |
| -0.618154 | 1.171168  | -1.773538 |
| -0.618231 | -1.590538 | -1.409612 |
| -1.838010 | -1.561152 | -2.191704 |
| 7.574760  | -0.530951 | 1.325115  |
| 7.574710  | -1.417317 | 0.170351  |
| 6.740911  | -2.562135 | 0.481602  |

|          |           |           |
|----------|-----------|-----------|
| 6.235033 | -2.387275 | 1.832467  |
| 6.740882 | -1.127523 | 2.350496  |
| 5.918033 | -0.315365 | 3.142403  |
| 4.932599 | -2.776173 | 2.131002  |
| 7.574759 | 0.855984  | 1.142219  |
| 7.574694 | -0.882219 | -1.122140 |
| 5.918074 | -3.117362 | -0.507620 |
| 6.740961 | 1.698104  | 1.977950  |
| 5.918060 | 1.119110  | 2.953357  |
| 4.554060 | -0.718127 | 3.430031  |
| 4.086107 | -1.932445 | 2.947333  |
| 4.086126 | -3.346741 | 1.104940  |
| 4.554065 | -3.499173 | -0.192890 |
| 5.918174 | -2.564010 | -1.844529 |
| 6.740920 | -1.471900 | -2.151606 |
| 7.574728 | 1.412814  | -0.202774 |
| 7.574729 | 0.561022  | -1.312418 |
| 6.235072 | 2.780492  | 1.151118  |
| 4.554074 | 1.582614  | 3.126730  |
| 3.689450 | 0.446134  | 3.384013  |
| 2.739288 | -2.015294 | 2.461503  |
| 4.554085 | -2.611431 | -2.337013 |
| 6.740957 | 2.599225  | -0.198803 |
| 6.740870 | 0.863875  | -2.459459 |
| 6.234899 | -0.393330 | -2.983358 |
| 2.739285 | -2.898861 | 1.310457  |
| 3.689437 | -3.153801 | -1.305766 |
| 2.351611 | -2.707661 | -1.121099 |
| 1.837895 | -2.678872 | 0.256005  |
| 2.351667 | 0.382980  | 2.905297  |
| 1.837898 | -0.939827 | 2.521390  |
| 4.086162 | 2.630352  | 2.345859  |
| 4.932673 | 3.233572  | 1.338688  |
| 5.918226 | 2.879295  | -1.298119 |
| 5.918203 | 1.998275  | -2.445828 |
| 4.932575 | -0.457343 | -3.469617 |
| 4.086118 | -1.586221 | -3.147252 |
| 4.086185 | 0.716561  | -3.450838 |
| 2.739313 | 0.314571  | -3.165826 |
| 2.739281 | -1.124072 | -2.976206 |
| 1.837904 | -1.713693 | -2.074771 |
| 0.618214 | -2.016030 | 0.672573  |
| 0.618195 | -0.950341 | -1.901130 |
| 0.618156 | -1.171179 | 1.773542  |
| 0.618241 | 1.590500  | 1.409609  |
| 1.838028 | 1.561150  | 2.191731  |
| 2.739287 | 2.584544  | 1.855277  |
| 4.086198 | 3.518891  | 0.199857  |

|          |          |           |
|----------|----------|-----------|
| 2.739338 | 3.139575 | 0.514550  |
| 4.554193 | 3.329739 | -1.093132 |
| 4.554191 | 1.916642 | -2.933794 |
| 3.689523 | 2.707722 | -2.078320 |
| 2.351621 | 2.324863 | -1.784415 |
| 1.837966 | 1.117766 | -2.447975 |
| 0.618311 | 0.425569 | -2.082189 |
| 0.618215 | 2.121503 | 0.127520  |
| 1.837913 | 2.653675 | -0.446751 |

**Table S5. Cartesian coordinates of *trans*-1 (C<sub>60</sub>)<sub>3</sub>**

|            |           |           |
|------------|-----------|-----------|
| -10.535769 | -1.176819 | 3.026695  |
| -9.804691  | -0.000023 | 3.467102  |
| -10.535769 | 1.176780  | 3.026710  |
| -11.708731 | 0.727904  | 2.304824  |
| -11.708731 | -0.727933 | 2.304815  |
| -12.145427 | -1.426975 | 1.174737  |
| -11.424985 | -2.604809 | 0.726844  |
| -10.295314 | -3.041190 | 1.425823  |
| -9.840610  | -2.312815 | 2.598978  |
| -8.390219  | -2.315395 | 2.592246  |
| -7.683889  | -1.175886 | 3.000616  |
| -8.408375  | -0.000023 | 3.445703  |
| -7.683888  | 1.175846  | 3.000631  |
| -8.390217  | 2.315361  | 2.592276  |
| -9.840609  | 2.312781  | 2.599009  |
| -10.295312 | 3.041173  | 1.425863  |
| -11.424984 | 2.604801  | 0.726879  |
| -12.145427 | 1.426961  | 1.174756  |
| -12.591806 | 0.699076  | 0.000011  |
| -12.591806 | -0.699074 | 0.000002  |
| -12.145430 | -1.426959 | -1.174744 |
| -11.424987 | -2.604800 | -0.726869 |
| -10.295317 | -3.041171 | -1.425856 |
| -9.122793  | -3.492423 | -0.698218 |
| -9.122792  | -3.492433 | 0.698177  |
| -7.948697  | -3.040061 | 1.425504  |
| -6.821087  | -2.590917 | 0.725716  |
| -6.069646  | -1.450747 | 1.176392  |
| -6.509919  | -0.740190 | 2.276504  |
| -6.509918  | 0.740158  | 2.276513  |
| -6.069643  | 1.450731  | 1.176412  |
| -6.821086  | 2.590907  | 0.725750  |
| -7.948695  | 3.040042  | 1.425544  |
| -9.122790  | 3.492424  | 0.698223  |

|            |           |           |
|------------|-----------|-----------|
| -9.122792  | 3.492434  | -0.698172 |
| -10.295315 | 3.041192  | -1.425815 |
| -11.424985 | 2.604811  | -0.726834 |
| -12.145429 | 1.426977  | -1.174725 |
| -11.708736 | 0.727935  | -2.304804 |
| -11.708736 | -0.727902 | -2.304814 |
| -10.535776 | -1.176779 | -3.026702 |
| -9.840616  | -2.312780 | -2.599002 |
| -8.390224  | -2.315360 | -2.592273 |
| -7.948700  | -3.040042 | -1.425542 |
| -6.821088  | -2.590907 | -0.725750 |
| -6.069646  | -1.450732 | -1.176413 |
| -5.355457  | -0.800898 | -0.000006 |
| -5.355457  | 0.800897  | 0.000003  |
| -6.069648  | 1.450746  | -1.176394 |
| -6.821088  | 2.590917  | -0.725716 |
| -7.948699  | 3.040061  | -1.425502 |
| -8.390223  | 2.315395  | -2.592242 |
| -9.840615  | 2.312816  | -2.598971 |
| -10.535775 | 1.176821  | -3.026687 |
| -9.804699  | 0.000024  | -3.467095 |
| -8.408383  | 0.000023  | -3.445700 |
| -7.683895  | -1.175846 | -3.000629 |
| -6.509924  | -0.740159 | -2.276513 |
| -6.509923  | 0.740189  | -2.276504 |
| -7.683895  | 1.175886  | -3.000614 |
| 7.683898   | 1.175850  | -3.000629 |
| 8.408387   | -0.000018 | -3.445701 |
| 7.683899   | -1.175882 | -3.000617 |
| 6.509926   | -0.740186 | -2.276508 |
| 6.509926   | 0.740162  | -2.276516 |
| 6.069647   | 1.450733  | -1.176415 |
| 6.821088   | 2.590908  | -0.725749 |
| 7.948700   | 3.040044  | -1.425539 |
| 8.390226   | 2.315364  | -2.592270 |
| 9.840618   | 2.312785  | -2.598998 |
| 10.535779  | 1.176785  | -3.026699 |
| 9.804703   | -0.000018 | -3.467095 |
| 10.535779  | -1.176815 | -3.026687 |
| 9.840619   | -2.312811 | -2.598974 |
| 8.390227   | -2.315391 | -2.592246 |
| 7.948702   | -3.040059 | -1.425507 |
| 6.821090   | -2.590916 | -0.725722 |
| 6.069649   | -1.450746 | -1.176399 |
| 5.355457   | -0.800898 | -0.000003 |
| 5.355457   | 0.800897  | -0.000010 |

|           |           |           |
|-----------|-----------|-----------|
| 6.069643  | 1.450745  | 1.176391  |
| 6.821085  | 2.590916  | 0.725717  |
| 7.948694  | 3.040060  | 1.425507  |
| 9.122790  | 3.492432  | 0.698181  |
| 9.122793  | 3.492425  | -0.698213 |
| 10.295317 | 3.041175  | -1.425850 |
| 11.424987 | 2.604802  | -0.726863 |
| 12.145431 | 1.426963  | -1.174739 |
| 11.708738 | 0.727907  | -2.304810 |
| 11.708739 | -0.727930 | -2.304802 |
| 12.145431 | -1.426973 | -1.174723 |
| 11.424988 | -2.604808 | -0.726835 |
| 10.295318 | -3.041189 | -1.425818 |
| 9.122794  | -3.492432 | -0.698176 |
| 9.122791  | -3.492424 | 0.698218  |
| 7.948695  | -3.040044 | 1.425539  |
| 6.821086  | -2.590908 | 0.725744  |
| 6.069643  | -1.450733 | 1.176406  |
| 6.509916  | -0.740162 | 2.276509  |
| 6.509916  | 0.740186  | 2.276502  |
| 7.683885  | 1.175882  | 3.000616  |
| 8.390215  | 2.315392  | 2.592248  |
| 9.840606  | 2.312812  | 2.598982  |
| 10.295311 | 3.041190  | 1.425829  |
| 11.424983 | 2.604810  | 0.726851  |
| 12.145425 | 1.426975  | 1.174742  |
| 12.591806 | 0.699076  | 0.000007  |
| 12.591806 | -0.699074 | 0.000014  |
| 12.145426 | -1.426961 | 1.174757  |
| 11.424984 | -2.604801 | 0.726878  |
| 10.295312 | -3.041173 | 1.425860  |
| 9.840607  | -2.312784 | 2.599006  |
| 8.390216  | -2.315364 | 2.592272  |
| 7.683885  | -1.175850 | 3.000628  |
| 8.408372  | 0.000018  | 3.445703  |
| 9.804687  | 0.000019  | 3.467103  |
| 10.535765 | 1.176816  | 3.026698  |
| 11.708728 | 0.727932  | 2.304819  |
| 11.708728 | -0.727906 | 2.304826  |
| 10.535766 | -1.176783 | 3.026711  |
| -1.426875 | 1.176768  | -2.995202 |
| -0.698327 | -0.000004 | -3.431487 |
| -1.426875 | -1.176774 | -2.995200 |
| -2.601581 | -0.740666 | -2.275108 |
| -2.601581 | 0.740660  | -2.275109 |
| -3.045924 | 1.452554  | -1.176004 |

|           |           |           |
|-----------|-----------|-----------|
| -2.298434 | 2.593916  | -0.726112 |
| -1.171664 | 3.047200  | -1.426216 |
| -0.724959 | 2.320328  | -2.590775 |
| 0.724956  | 2.320328  | -2.590776 |
| 1.426872  | 1.176768  | -2.995204 |
| 0.698323  | -0.000003 | -3.431488 |
| 1.426872  | -1.176774 | -2.995201 |
| 0.724956  | -2.320334 | -2.590772 |
| -0.724959 | -2.320334 | -2.590772 |
| -1.171664 | -3.047204 | -1.426212 |
| -2.298434 | -2.593919 | -0.726108 |
| -3.045923 | -1.452558 | -1.176002 |
| -3.759356 | -0.801736 | -0.000003 |
| -3.759356 | 0.801735  | -0.000002 |
| -3.045921 | 1.452556  | 1.175995  |
| -2.298433 | 2.593917  | 0.726101  |
| -1.171662 | 3.047202  | 1.426203  |
| 0.000000  | 3.500436  | 0.698013  |
| -0.000001 | 3.500435  | -0.698029 |
| 1.171662  | 3.047200  | -1.426218 |
| 2.298433  | 2.593916  | -0.726115 |
| 3.045921  | 1.452554  | -1.176008 |
| 2.601578  | 0.740661  | -2.275113 |
| 2.601579  | -0.740665 | -2.275111 |
| 3.045923  | -1.452557 | -1.176005 |
| 2.298433  | -2.593919 | -0.726111 |
| 1.171663  | -3.047203 | -1.426213 |
| 0.000000  | -3.500438 | -0.698023 |
| 0.000000  | -3.500436 | 0.698019  |
| -1.171663 | -3.047201 | 1.426208  |
| -2.298433 | -2.593918 | 0.726105  |
| -3.045923 | -1.452556 | 1.175997  |
| -2.601578 | -0.740661 | 2.275101  |
| -2.601579 | 0.740664  | 2.275102  |
| -1.426872 | 1.176773  | 2.995192  |
| -0.724956 | 2.320333  | 2.590763  |
| 0.724959  | 2.320333  | 2.590762  |
| 1.171664  | 3.047202  | 1.426202  |
| 2.298434  | 2.593917  | 0.726098  |
| 3.045924  | 1.452556  | 1.175992  |
| 3.759355  | 0.801735  | -0.000009 |
| 3.759356  | -0.801736 | -0.000006 |
| 3.045923  | -1.452556 | 1.175994  |
| 2.298434  | -2.593918 | 0.726102  |
| 1.171664  | -3.047201 | 1.426206  |
| 0.724959  | -2.320330 | 2.590765  |

|           |           |          |
|-----------|-----------|----------|
| -0.724956 | -2.320330 | 2.590766 |
| -1.426872 | -1.176769 | 2.995193 |
| -0.698323 | 0.000002  | 3.431478 |
| 0.698327  | 0.000002  | 3.431477 |
| 1.426875  | 1.176773  | 2.995190 |
| 2.601581  | 0.740664  | 2.275098 |
| 2.601581  | -0.740662 | 2.275099 |
| 1.426875  | -1.176769 | 2.995192 |

**Table S6. Cartesian coordinates of *trans*-2 (C<sub>60</sub>)<sub>3</sub>**

|           |           |           |
|-----------|-----------|-----------|
| 9.920596  | -0.923041 | 3.330701  |
| 9.062623  | -2.096716 | 3.334017  |
| 9.425761  | -3.227720 | 2.595444  |
| 10.655934 | -3.231704 | 1.830485  |
| 11.480543 | -2.101896 | 1.824803  |
| 11.105450 | -0.925914 | 2.588509  |
| 9.068584  | 0.252668  | 3.330930  |
| 7.687778  | -0.200752 | 3.333615  |
| 7.684899  | -1.643399 | 3.335240  |
| 6.719154  | -2.328963 | 2.585916  |
| 8.422023  | -3.950270 | 1.831179  |
| 10.416631 | -3.963648 | 0.595033  |
| 11.011496 | -3.536801 | -0.596706 |
| 11.862026 | -2.359510 | -0.601562 |
| 12.091596 | -1.656463 | 0.584854  |
| 12.092239 | -0.204158 | 0.581705  |
| 11.483922 | 0.248223  | 1.819478  |
| 10.663037 | 1.380174  | 1.822298  |
| 9.432123  | 1.380597  | 2.592350  |
| 6.723369  | 0.485808  | 2.584467  |
| 7.101048  | 1.658307  | 1.816775  |
| 8.429926  | 2.101910  | 1.825647  |
| 9.034840  | 2.543912  | 0.592683  |
| 10.416050 | 2.101244  | 0.584312  |
| 11.001983 | 1.661438  | -0.607193 |
| 11.856272 | 0.491515  | -0.608498 |
| 11.617405 | -0.240433 | -1.844012 |
| 11.623810 | -1.639254 | -1.840041 |
| 9.038876  | -4.411285 | 0.598076  |
| 8.284146  | -2.132256 | -3.335042 |
| 7.920476  | -3.260112 | -2.596443 |
| 6.688305  | -3.258394 | -1.825598 |
| 5.871509  | -2.120207 | -1.812523 |
| 6.249837  | -0.947944 | -2.580162 |
| 8.273834  | 0.214979  | -3.336730 |

|           |           |           |
|-----------|-----------|-----------|
| 9.655847  | -0.224952 | -3.340641 |
| 9.663388  | -1.678670 | -3.338957 |
| 10.627943 | -2.371508 | -2.600999 |
| 10.249408 | -3.545680 | -1.831989 |
| 8.920894  | -3.981784 | -1.830586 |
| 6.923762  | -3.972167 | -0.594130 |
| 6.332664  | -3.511575 | 0.590149  |
| 5.475727  | -2.346106 | 0.579037  |
| 5.226500  | -1.679338 | -0.605093 |
| 4.960794  | -0.182246 | -0.675015 |
| 5.840238  | 0.220784  | -1.849484 |
| 6.661732  | 1.331407  | -1.829929 |
| 7.895569  | 1.335650  | -2.584955 |
| 10.615299 | 0.477908  | -2.604540 |
| 10.228015 | 1.650809  | -1.837748 |
| 8.894027  | 2.063792  | -1.824084 |
| 8.282007  | 2.518456  | -0.589179 |
| 6.904856  | 2.075824  | -0.573696 |
| 6.316219  | 1.680016  | 0.611906  |
| 5.223771  | 0.622549  | 0.684336  |
| 5.703908  | -0.220451 | 1.856603  |
| 5.718876  | -1.601863 | 1.835338  |
| 8.302372  | -4.422889 | -0.591030 |
| 7.098997  | -3.503250 | 1.822488  |
| 7.430758  | -0.955792 | -3.333594 |
| 0.387437  | 0.706928  | 3.341221  |
| -0.994480 | 1.151673  | 3.335718  |
| -1.951132 | 0.461148  | 2.579411  |
| -1.561491 | -0.707473 | 1.810833  |
| -0.226732 | -1.132634 | 1.816581  |
| 0.767799  | -0.410244 | 2.587983  |
| 1.228248  | 1.877651  | 3.344886  |
| 0.369890  | 3.052438  | 3.342561  |
| -1.004824 | 2.595527  | 3.336785  |
| -1.968239 | 3.275842  | 2.577600  |
| -2.968436 | 1.160073  | 1.846339  |
| -2.347797 | -0.742338 | 0.607158  |
| -1.760743 | -1.145105 | -0.576018 |
| -0.380492 | -1.580649 | -0.589633 |
| 0.380451  | -1.580641 | 0.589709  |
| 1.760717  | -1.145142 | 0.576086  |
| 2.004282  | -0.405901 | 1.836575  |
| 2.824846  | 0.705952  | 1.860691  |
| 2.411146  | 1.872966  | 2.593199  |
| 0.735437  | 4.180341  | 2.602002  |
| 1.967662  | 4.183437  | 1.840563  |



|           |           |           |
|-----------|-----------|-----------|
| 2.787448  | 3.045668  | 1.827672  |
| 3.437273  | 2.610113  | 0.622046  |
| 3.704576  | 1.113848  | 0.688230  |
| 3.442241  | 0.311788  | -0.674531 |
| 2.347743  | -0.742373 | -0.607108 |
| 1.561457  | -0.707528 | -1.810781 |
| 0.226694  | -1.132675 | -1.816514 |
| -3.442258 | 0.311914  | 0.674555  |
| -1.228236 | 1.877596  | -3.344881 |
| -2.411138 | 1.872949  | -2.593187 |
| -2.787432 | 3.045676  | -1.827692 |
| -1.967638 | 4.183435  | -1.840621 |
| -0.735399 | 4.180285  | -2.602043 |
| 1.004844  | 2.595442  | -3.336803 |
| 0.994476  | 1.151580  | -3.335709 |
| -0.387450 | 0.706869  | -3.341190 |
| -0.767833 | -0.410298 | -2.587940 |
| -2.004296 | -0.405914 | -1.836530 |
| -2.824838 | 0.705966  | -1.860655 |
| -3.437297 | 2.610158  | -0.622061 |
| -3.195148 | 3.281812  | 0.561700  |
| -2.340537 | 4.449056  | 0.574085  |
| -1.739391 | 4.903550  | -0.608057 |
| -0.364145 | 5.353676  | -0.597449 |
| 0.262939  | 4.899903  | -1.829144 |
| 1.585062  | 4.448690  | -1.811943 |
| 1.968267  | 3.275749  | -2.577626 |
| 1.951121  | 0.461066  | -2.579397 |
| 2.968470  | 1.159978  | -1.846346 |
| 2.958582  | 2.543682  | -1.821459 |
| 3.195205  | 3.281762  | -0.561739 |
| 2.340581  | 4.449002  | -0.574141 |
| 1.739434  | 4.903532  | 0.607988  |
| 0.364202  | 5.353687  | 0.597376  |
| -0.262893 | 4.899950  | 1.829081  |
| -1.585022 | 4.448766  | 1.811893  |
| -3.704567 | 1.113840  | -0.688209 |
| -2.958567 | 2.543783  | 1.821450  |
| -0.369865 | 3.052376  | -3.342591 |
| -8.429880 | 2.101630  | -1.826085 |
| -9.034859 | 2.543807  | -0.593220 |
| -8.282089 | 2.518550  | 0.588688  |
| -6.904928 | 2.075949  | 0.573347  |
| -6.316240 | 1.679945  | -0.612172 |
| -7.100992 | 1.658052  | -1.817077 |
| -9.432027 | 1.380207  | -2.592747 |

|            |           |           |
|------------|-----------|-----------|
| -10.662981 | 1.379877  | -1.822757 |
| -10.416066 | 2.101130  | -0.584861 |
| -11.002057 | 1.661500  | 0.606680  |
| -8.894171  | 2.064050  | 1.823623  |
| -6.661860  | 1.331693  | 1.829685  |
| -5.840326  | 0.221112  | 1.849482  |
| -4.960828  | -0.182133 | 0.675111  |
| -5.223755  | 0.622554  | -0.684381 |
| -5.703789  | -0.220675 | -1.856558 |
| -6.723250  | 0.485449  | -2.584579 |
| -7.687604  | -0.201228 | -3.333677 |
| -9.068419  | 0.252165  | -3.331120 |
| -11.483849 | 0.247917  | -1.819811 |
| -11.105309 | -0.926330 | -2.588644 |
| -9.920414  | -0.923555 | -3.330770 |
| -9.062425  | -2.097220 | -3.333870 |
| -7.684708  | -1.643885 | -3.335084 |
| -6.719000  | -2.329311 | -2.585598 |
| -5.718774  | -1.602076 | -1.835062 |
| -5.475668  | -2.346155 | -0.578653 |
| -5.226550  | -1.679194 | 0.605399  |
| -7.895742  | 1.336041  | 2.584659  |
| -7.920592  | -3.259722 | 2.596832  |
| -8.284316  | -2.131756 | 3.335239  |
| -9.663566  | -1.678187 | 3.339014  |
| -10.628067 | -2.371153 | 2.601107  |
| -10.249480 | -3.545435 | 1.832292  |
| -8.302363  | -4.422798 | 0.591570  |
| -6.923756  | -3.972055 | 0.594678  |
| -6.688389  | -3.258091 | 1.826046  |
| -5.871602  | -2.119894 | 1.812860  |
| -6.249983  | -0.947524 | 2.580304  |
| -7.430939  | -0.955285 | 3.333670  |
| -9.656043  | -0.224468 | 3.340483  |
| -10.615462 | 0.478268  | 2.604215  |
| -11.617519 | -0.240198 | 1.843744  |
| -11.623898 | -1.639020 | 1.839982  |
| -11.862041 | -2.359462 | 0.601599  |
| -11.011500 | -3.536748 | 0.596966  |
| -10.416563 | -3.963759 | -0.594678 |
| -9.038802  | -4.411379 | -0.597577 |
| -6.332599  | -3.511624 | -0.589636 |
| -7.098866  | -3.503490 | -1.822017 |
| -8.421886  | -3.950534 | -1.830714 |
| -9.425589  | -3.228112 | -2.595140 |
| -10.655806 | -3.232007 | -1.830252 |

|            |           |           |
|------------|-----------|-----------|
| -11.480424 | -2.102204 | -1.824778 |
| -12.091561 | -1.656593 | -0.584933 |
| -12.092224 | -0.204290 | -0.582004 |
| -11.856333 | 0.491563  | 0.608110  |
| -8.274040  | 0.215477  | 3.336571  |
| -10.228158 | 1.651063  | 1.837281  |
| -8.920961  | -3.981521 | 1.831029  |

**Table S7. Cartesian coordinates of *trans*-3 (C<sub>60</sub>)<sub>3</sub>**

|            |           |           |
|------------|-----------|-----------|
| -10.096597 | -0.073006 | -2.409966 |
| -9.157412  | -0.800487 | -3.248111 |
| -9.158141  | -2.199256 | -3.243864 |
| -10.094742 | -2.922879 | -2.408460 |
| -10.996806 | -2.223583 | -1.600012 |
| -10.997073 | -0.772136 | -1.600420 |
| -9.416114  | 1.099973  | -1.891206 |
| -8.058970  | 1.091202  | -2.411179 |
| -7.900692  | -0.076279 | -3.243942 |
| -6.686718  | -0.776241 | -3.221370 |
| -7.899621  | -2.927141 | -3.238026 |
| -9.418697  | -4.103719 | -1.891018 |
| -9.671928  | -4.538493 | -0.586003 |
| -10.604048 | -3.807024 | 0.253896  |
| -11.253269 | -2.672874 | -0.242923 |
| -11.410195 | -1.497868 | 0.596267  |
| -11.252817 | -0.323101 | -0.241679 |
| -10.597640 | 0.807611  | 0.255537  |
| -9.661465  | 1.531183  | -0.585971 |
| -6.994744  | 1.502738  | -1.598272 |
| -7.249746  | 1.951299  | -0.241608 |
| -8.560043  | 1.971856  | 0.253702  |
| -8.811979  | 1.525110  | 1.602227  |
| -10.070886 | 0.804879  | 1.610554  |
| -10.222259 | -0.329447 | 2.414897  |
| -10.905147 | -1.498998 | 1.900652  |
| -10.229156 | -2.680022 | 2.417983  |
| -10.084955 | -3.812853 | 1.610315  |
| -8.065218  | -4.108672 | -2.407264 |
| -6.418421  | -4.135259 | 1.896388  |
| -6.172996  | -4.566586 | 0.591228  |
| -5.235980  | -3.841269 | -0.250361 |
| -4.588454  | -2.701138 | 0.243144  |
| -4.843927  | -2.252701 | 1.599729  |
| -6.661820  | -2.231661 | 3.247981  |
| -7.923327  | -2.947526 | 3.254458  |

|           |           |           |
|-----------|-----------|-----------|
| -7.773727 | -4.126513 | 2.417101  |
| -8.834093 | -4.549136 | 1.609552  |
| -8.578593 | -4.998270 | 0.250711  |
| -7.272500 | -5.007444 | -0.248350 |
| -5.750663 | -3.833032 | -1.598130 |
| -5.594663 | -2.684213 | -2.385581 |
| -4.905157 | -1.524167 | -1.864537 |
| -4.386603 | -1.542179 | -0.584047 |
| -4.275507 | -0.297154 | 0.284236  |
| -4.800565 | -0.815394 | 1.615084  |
| -5.705517 | -0.117656 | 2.391581  |
| -6.649578 | -0.830440 | 3.224323  |
| -9.129351 | -2.238933 | 3.251354  |
| -9.118674 | -0.785191 | 3.244420  |
| -7.902775 | -0.098610 | 3.223208  |
| -7.741618 | 1.077456  | 2.388437  |
| -6.392912 | 1.083139  | 1.865479  |
| -6.147311 | 1.538148  | 0.584331  |
| -5.019299 | 1.001873  | -0.285104 |
| -5.734102 | 0.811110  | -1.614709 |
| -5.592649 | -0.323314 | -2.390494 |
| -7.009690 | -4.553036 | -1.604138 |
| -6.691227 | -2.227400 | -3.219219 |
| -5.736966 | -2.960743 | 2.414444  |
| -1.242978 | 3.732053  | -3.243895 |
| 0.018747  | 4.449107  | -3.239696 |
| 1.223053  | 3.740300  | -3.214302 |
| 1.217198  | 2.287680  | -3.209848 |
| -0.002968 | 1.600150  | -3.215016 |
| -1.254443 | 2.329277  | -3.224468 |
| -2.169168 | 4.458072  | -2.416108 |
| -1.492509 | 5.638744  | -1.896872 |
| -0.139062 | 5.634863  | -2.410765 |
| 0.917863  | 6.070578  | -1.603940 |
| 2.318582  | 4.189481  | -2.382703 |
| 2.313893  | 1.828046  | -2.384784 |
| 2.173457  | 0.689540  | -1.613486 |
| 0.911290  | 0.004205  | -1.592442 |
| -0.164462 | 0.431641  | -2.386940 |
| -1.515701 | 0.416191  | -1.867184 |
| -2.201754 | 1.615127  | -2.394633 |
| -3.107478 | 2.313313  | -1.617752 |
| -3.064878 | 3.749783  | -1.602564 |
| -1.746530 | 6.073571  | -0.593372 |
| -2.680829 | 5.343327  | 0.246474  |
| -3.322295 | 4.199000  | -0.247489 |

|           |           |           |
|-----------|-----------|-----------|
| -3.523019 | 3.040509  | 0.580039  |
| -3.633343 | 1.795189  | -0.287019 |
| -2.889392 | 0.496116  | 0.283433  |
| -1.761159 | -0.038273 | -0.587070 |
| -0.658546 | -0.440670 | 0.243676  |
| 0.658597  | -0.440631 | -0.243913 |
| 3.003339  | 3.023885  | -1.860306 |
| 2.201773  | 1.615006  | 2.394513  |
| 3.107524  | 2.313239  | 1.617718  |
| 3.064871  | 3.749722  | 1.602626  |
| 2.169158  | 4.457936  | 2.416215  |
| 1.242970  | 3.731855  | 3.243951  |
| 0.002994  | 1.599928  | 3.214933  |
| 0.164506  | 0.431488  | 2.386775  |
| 1.515743  | 0.416074  | 1.867038  |
| 1.761169  | -0.038232 | 0.586847  |
| 2.889426  | 0.496171  | -0.283543 |
| 3.633370  | 1.795240  | 0.286879  |
| 3.322280  | 4.199033  | 0.247578  |
| 2.680778  | 5.343379  | -0.246317 |
| 1.746488  | 6.073566  | 0.593585  |
| 1.492465  | 5.638628  | 1.897041  |
| 0.139020  | 5.634701  | 2.410950  |
| -0.018768 | 4.448885  | 3.239788  |
| -1.223062 | 3.740058  | 3.214360  |
| -1.217187 | 2.287442  | 3.209816  |
| -0.911232 | 0.004081  | 1.592226  |
| -2.173375 | 0.689429  | 1.613300  |
| -2.313885 | 1.827839  | 2.384745  |
| -3.003320 | 3.023693  | 1.860286  |
| -2.318588 | 4.189276  | 2.382768  |
| -2.170203 | 5.340688  | 1.594769  |
| -0.917903 | 6.070448  | 1.604146  |
| -0.654207 | 6.525336  | 0.247724  |
| 0.654146  | 6.525355  | -0.247485 |
| 3.522982  | 3.040612  | -0.580028 |
| 2.170165  | 5.340832  | -1.594603 |
| 1.254456  | 2.329081  | 3.224421  |
| 8.560065  | 1.971821  | -0.254270 |
| 8.811915  | 1.524852  | -1.602747 |
| 7.741511  | 1.077080  | -2.388821 |
| 6.392823  | 1.082858  | -1.865769 |
| 6.147284  | 1.538126  | -0.584716 |
| 7.249805  | 1.951365  | 0.241100  |
| 9.661539  | 1.531246  | 0.585400  |
| 10.597659 | 0.807540  | -0.256062 |

|           |           |           |
|-----------|-----------|-----------|
| 10.070802 | 0.804600  | -1.611037 |
| 10.222121 | -0.329856 | -2.415210 |
| 7.902595  | -0.099102 | -3.223434 |
| 5.705374  | -0.117978 | -2.391704 |
| 4.800531  | -0.815622 | -1.614978 |
| 4.275514  | -0.297140 | -0.284278 |
| 5.019341  | 1.001952  | 0.284937  |
| 5.734274  | 0.811367  | 1.614456  |
| 6.994886  | 1.502997  | 1.597852  |
| 8.059153  | 1.091558  | 2.410763  |
| 9.416271  | 1.100246  | 1.890716  |
| 11.252829 | -0.323119 | 0.241291  |
| 10.997184 | -0.771938 | 1.600111  |
| 10.096764 | -0.072661 | 2.409607  |
| 9.157627  | -0.800004 | 3.247921  |
| 7.900914  | -0.075771 | 3.243733  |
| 6.686932  | -0.775728 | 3.221312  |
| 5.592792  | -0.322908 | 2.390465  |
| 4.905279  | -1.523833 | 1.864702  |
| 4.386596  | -1.542039 | 0.584274  |
| 6.649386  | -0.830918 | -3.224372 |
| 6.172917  | -4.566636 | -0.590652 |
| 6.418257  | -4.135551 | -1.895901 |
| 7.773537  | -4.126901 | -2.416693 |
| 8.833946  | -4.549390 | -1.609132 |
| 8.578519  | -4.998306 | -0.250206 |
| 7.009744  | -4.552771 | 1.604665  |
| 5.750729  | -3.832758 | 1.598631  |
| 5.235935  | -3.841203 | 0.250897  |
| 4.588427  | -2.701130 | -0.242757 |
| 4.843830  | -2.252912 | -1.599417 |
| 5.736813  | -2.961086 | -2.414093 |
| 7.923106  | -2.948026 | -3.254231 |
| 9.129143  | -2.239451 | -3.251319 |
| 10.228995 | -2.680435 | -2.417953 |
| 10.084812 | -3.813135 | -1.610095 |
| 10.604009 | -3.807105 | -0.253714 |
| 9.671931  | -4.538432 | 0.586368  |
| 9.418781  | -4.103442 | 1.891321  |
| 8.065328  | -4.108292 | 2.407654  |
| 5.594794  | -2.683818 | 2.385909  |
| 6.691418  | -2.226876 | 3.219399  |
| 7.899809  | -2.926636 | 3.238236  |
| 9.158345  | -2.198773 | 3.243899  |
| 10.094879 | -2.922544 | 2.408548  |
| 10.996901 | -2.223382 | 1.599936  |

|           |           |           |
|-----------|-----------|-----------|
| 11.253271 | -2.672895 | 0.242894  |
| 11.410158 | -1.498009 | -0.596483 |
| 10.905028 | -1.499340 | -1.900837 |
| 6.661609  | -2.232146 | -3.247794 |
| 9.118481  | -0.785714 | -3.244589 |
| 7.272461  | -5.007395 | 0.248928  |

**Table S8. Cartesian coordinates of *trans*-4 (C<sub>60</sub>)<sub>3</sub>**

|            |           |           |
|------------|-----------|-----------|
| -6.670910  | -4.758382 | 1.830376  |
| -5.954257  | -3.759014 | 2.602248  |
| -6.659826  | -2.800527 | 3.332522  |
| -8.111613  | -2.800961 | 3.321643  |
| -8.803617  | -3.761558 | 2.577724  |
| -8.069212  | -4.759527 | 1.817485  |
| -5.933026  | -4.985147 | 0.598441  |
| -4.764638  | -4.125965 | 0.612421  |
| -4.776543  | -3.373100 | 1.842991  |
| -4.356344  | -2.036577 | 1.832742  |
| -6.217127  | -1.416250 | 3.334049  |
| -8.559027  | -1.417759 | 3.317259  |
| -9.682704  | -1.051109 | 2.569237  |
| -10.401831 | -2.047673 | 1.802319  |
| -9.970568  | -3.378277 | 1.804310  |
| -9.959140  | -4.138357 | 0.566832  |
| -8.783285  | -4.990799 | 0.575130  |
| -8.072629  | -5.211254 | -0.609191 |
| -6.624150  | -5.205661 | -0.597464 |
| -4.334922  | -3.505180 | -0.568301 |
| -5.053028  | -3.738087 | -1.807666 |
| -6.169828  | -4.576385 | -1.826659 |
| -7.341300  | -4.204756 | -2.603235 |
| -8.516266  | -4.592261 | -1.849840 |
| -9.652982  | -3.777185 | -1.856986 |
| -10.385296 | -3.543845 | -0.624681 |
| -10.840084 | -2.164517 | -0.627804 |
| -10.845400 | -1.428507 | 0.561632  |
| -7.383904  | -0.567725 | 3.324338  |
| -8.794771  | 1.401461  | -0.622040 |
| -8.083776  | 1.613916  | 0.566805  |
| -6.637357  | 1.624203  | 0.566133  |
| -5.942394  | 1.431324  | -0.612321 |
| -6.668757  | 1.163997  | -1.824332 |
| -8.788122  | 0.170170  | -2.620247 |
| -9.965004  | -0.214226 | -1.861719 |
| -9.968364  | 0.549281  | -0.624595 |

|            |           |           |
|------------|-----------|-----------|
| -10.399744 | -0.050162 | 0.563322  |
| -9.673732  | 0.183105  | 1.801056  |
| -8.535423  | 0.992164  | 1.797768  |
| -6.186270  | 0.994748  | 1.827669  |
| -5.058629  | 0.196996  | 1.859870  |
| -4.085546  | 0.087486  | 0.695260  |
| -4.573705  | 0.768381  | -0.669702 |
| -4.753977  | -0.183741 | -1.842851 |
| -5.935543  | 0.167415  | -2.583358 |
| -6.629342  | -0.787185 | -3.338556 |
| -8.082606  | -0.788302 | -3.350585 |
| -10.390993 | -1.546040 | -1.861820 |
| -9.656519  | -2.543807 | -2.622207 |
| -8.524208  | -2.171417 | -3.353192 |
| -7.342397  | -3.018057 | -3.343513 |
| -6.175619  | -2.156605 | -3.333783 |
| -5.051540  | -2.504912 | -2.572631 |
| -4.336812  | -1.500655 | -1.815668 |
| -3.885540  | -2.130298 | -0.554146 |
| -3.869609  | -1.417635 | 0.629444  |
| -7.367218  | 0.613833  | 2.571064  |
| -5.089885  | -1.040310 | 2.591841  |
| -8.069691  | 1.169831  | -1.847555 |
| 0.702891   | 0.635310  | 1.844243  |
| 1.428231   | 1.630900  | 2.613532  |
| 0.727990   | 2.582591  | 3.362193  |
| -0.727950  | 2.582606  | 3.362213  |
| -1.428229  | 1.630943  | 2.613561  |
| -0.702928  | 0.635334  | 1.844259  |
| 1.427313   | 0.365533  | 0.646220  |
| 2.796005   | 1.028070  | 0.704822  |
| 2.612797   | 1.982255  | 1.877583  |
| 3.024024   | 3.301199  | 1.847796  |
| 1.174119   | 3.952817  | 3.356089  |
| -1.174044  | 3.952849  | 3.356120  |
| -2.301123  | 4.304971  | 2.598704  |
| -3.023983  | 3.301273  | 1.847846  |
| -2.612812  | 1.982315  | 1.877640  |
| -2.796061  | 1.028148  | 0.704877  |
| -1.427382  | 0.365568  | 0.646250  |
| -0.721964  | 0.183107  | -0.532309 |
| 0.721867   | 0.183076  | -0.532324 |
| 3.283513   | 1.709566  | -0.660388 |
| 2.310515   | 1.598754  | -1.824648 |
| 1.176253   | 0.811243  | -1.788366 |
| -0.000059  | 1.188839  | -2.539977 |



|           |           |           |
|-----------|-----------|-----------|
| -1.176354 | 0.811282  | -1.788334 |
| -2.310607 | 1.598814  | -1.824598 |
| -3.283580 | 1.709662  | -0.660299 |
| -3.497833 | 3.214147  | -0.596044 |
| -3.475432 | 3.928563  | 0.584858  |
| 0.000051  | 4.806473  | 3.353006  |
| -1.425500 | 6.778515  | -0.585980 |
| -0.723072 | 6.994636  | 0.604898  |
| 0.723171  | 6.994618  | 0.604883  |
| 1.425564  | 6.778478  | -0.586010 |
| 0.699572  | 6.552580  | -1.823979 |
| -1.424390 | 5.553171  | -2.589833 |
| -2.594241 | 5.167809  | -1.820649 |
| -2.595356 | 5.921241  | -0.589861 |
| -3.018507 | 5.302608  | 0.593850  |
| -2.294747 | 5.533662  | 1.828822  |
| -1.171529 | 6.366761  | 1.839223  |
| 1.171636  | 6.366730  | 1.839199  |
| 2.294833  | 5.533605  | 1.828775  |
| 3.018551  | 5.302523  | 0.593784  |
| 2.595393  | 5.921166  | -0.589916 |
| 2.594244  | 5.167745  | -1.820707 |
| 1.424374  | 5.553129  | -2.589853 |
| 0.725423  | 4.593473  | -3.326256 |
| -0.725469 | 4.593490  | -3.326230 |
| -3.015512 | 3.831005  | -1.805135 |
| -2.287106 | 2.834643  | -2.562782 |
| -1.167548 | 3.208331  | -3.318312 |
| -0.000053 | 2.363009  | -3.309081 |
| 1.167464  | 3.208305  | -3.318331 |
| 2.287034  | 2.834585  | -2.562838 |
| 3.015468  | 3.830926  | -1.805194 |
| 3.497823  | 3.214055  | -0.596125 |
| 3.475425  | 3.928457  | 0.584784  |
| 0.000056  | 5.989687  | 2.605050  |
| 2.301205  | 4.304916  | 2.598670  |
| -0.699539 | 6.552593  | -1.823961 |
| 8.524190  | -2.171513 | -3.353189 |
| 8.082554  | -0.788407 | -3.350626 |
| 8.788052  | 0.170109  | -2.620329 |
| 9.964953  | -0.214226 | -1.861799 |
| 10.390971 | -1.546031 | -1.861856 |
| 9.656518  | -2.543849 | -2.622202 |
| 7.342402  | -3.018179 | -3.343471 |
| 6.175601  | -2.156758 | -3.333761 |
| 6.629292  | -0.787324 | -3.338577 |

|           |           |           |
|-----------|-----------|-----------|
| 5.935473  | 0.167289  | -2.583417 |
| 8.069607  | 1.169785  | -1.847667 |
| 9.968308  | 0.549330  | -0.624704 |
| 10.399705 | -0.050063 | 0.563231  |
| 10.845394 | -1.428396 | 0.561590  |
| 10.840089 | -2.164448 | -0.627819 |
| 10.385332 | -3.543786 | -0.624642 |
| 9.653022  | -3.777195 | -1.856933 |
| 8.516323  | -4.592298 | -1.849747 |
| 7.341340  | -4.204851 | -2.603146 |
| 5.051540  | -2.505067 | -2.572581 |
| 5.053066  | -3.738207 | -1.807561 |
| 6.169884  | -4.576486 | -1.826550 |
| 6.624236  | -5.205693 | -0.597335 |
| 8.072716  | -5.211263 | -0.609077 |
| 8.783360  | -4.990733 | 0.575239  |
| 9.959197  | -4.138272 | 0.566892  |
| 9.970625  | -3.378141 | 1.804342  |
| 10.401852 | -2.047527 | 1.802306  |
| 8.794690  | 1.401481  | -0.622171 |
| 7.383904  | -0.567603 | 3.324292  |
| 7.367180  | 0.613930  | 2.570976  |
| 6.186219  | 0.994784  | 1.827567  |
| 5.058590  | 0.197012  | 1.859821  |
| 5.089892  | -1.040265 | 2.591829  |
| 6.659885  | -2.800419 | 3.332561  |
| 8.111671  | -2.800819 | 3.321679  |
| 8.559051  | -1.417606 | 3.317240  |
| 9.682708  | -1.050952 | 2.569191  |
| 9.673703  | 0.183237  | 1.800964  |
| 8.535369  | 0.992260  | 1.797656  |
| 6.637278  | 1.624207  | 0.566019  |
| 5.942314  | 1.431266  | -0.612428 |
| 4.573639  | 0.768283  | -0.669774 |
| 4.085489  | 0.087432  | 0.695216  |
| 3.869604  | -1.417701 | 0.629461  |
| 4.356370  | -2.036584 | 1.832773  |
| 4.776602  | -3.373091 | 1.843076  |
| 5.954327  | -3.758950 | 2.602335  |
| 8.803694  | -3.761422 | 2.577786  |
| 8.069307  | -4.759446 | 1.817606  |
| 6.671002  | -4.758326 | 1.830476  |
| 5.933110  | -4.985158 | 0.598575  |
| 4.764714  | -4.126007 | 0.612525  |
| 4.334956  | -3.505269 | -0.568210 |
| 3.885543  | -2.130395 | -0.554105 |

|          |           |           |
|----------|-----------|-----------|
| 4.336782 | -1.500797 | -1.815671 |
| 4.753932 | -0.183877 | -1.842877 |
| 8.083700 | 1.613958  | 0.566672  |
| 6.668670 | 1.163916  | -1.824432 |
| 6.217151 | -1.416153 | 3.334042  |

**Table S9. Cartesian coordinates of  $e-(C_{60})_3$**

|           |          |           |
|-----------|----------|-----------|
| -0.529688 | 3.813507 | -3.456397 |
| -1.872474 | 4.128952 | -3.008950 |
| -2.179013 | 5.433480 | -2.596695 |
| -1.151527 | 6.458241 | -2.603226 |
| 0.142852  | 6.147890 | -3.035155 |
| 0.456107  | 4.800431 | -3.478404 |
| -0.210801 | 2.470966 | -3.005627 |
| -1.337260 | 1.951033 | -2.280334 |
| -2.388387 | 2.987742 | -2.282175 |
| -3.198281 | 3.177914 | -1.176987 |
| -2.998732 | 5.629217 | -1.426913 |
| -1.341979 | 7.290195 | -1.427563 |
| -0.232433 | 7.777366 | -0.728305 |
| 1.105976  | 7.453953 | -1.175742 |
| 1.292104  | 6.655030 | -2.310758 |
| 2.316113  | 5.624915 | -2.313504 |
| 1.805742  | 4.487322 | -3.034149 |
| 2.116140  | 3.196163 | -2.588823 |
| 1.091815  | 2.168723 | -2.577428 |
| -1.125957 | 1.144421 | -1.173377 |
| 0.210897  | 0.866113 | -0.736834 |
| 1.310317  | 1.322590 | -1.448377 |
| 2.646901  | 1.649295 | -0.799981 |
| 2.971058  | 2.986444 | -1.450836 |
| 3.433668  | 4.077165 | -0.740526 |
| 3.108018  | 5.418297 | -1.175093 |
| 2.907600  | 6.243989 | -0.000021 |
| 1.933439  | 7.247137 | -0.000020 |
| -2.487483 | 6.777055 | -0.698628 |
| 0.142879  | 6.147915 | 3.035143  |
| -1.151502 | 6.458262 | 2.603223  |
| -2.178992 | 5.433501 | 2.596709  |
| -1.872451 | 4.128973 | 3.008978  |
| -0.529658 | 3.813529 | 3.456404  |
| 1.805763  | 4.487342 | 3.034122  |
| 2.316129  | 5.624930 | 2.313470  |
| 1.292125  | 6.655050 | 2.310730  |
| 1.105988  | 7.453964 | 1.175709  |

|           |           |           |
|-----------|-----------|-----------|
| -0.232426 | 7.777374  | 0.728284  |
| -1.341964 | 7.290212  | 1.427557  |
| -2.998707 | 5.629231  | 1.426934  |
| -3.474859 | 4.511329  | 0.726903  |
| -3.198229 | 3.177956  | 1.177011  |
| -2.388379 | 2.987760  | 2.282235  |
| -1.337246 | 1.951057  | 2.280331  |
| -0.210779 | 2.470988  | 3.005627  |
| 1.091833  | 2.168744  | 2.577427  |
| 2.116157  | 3.196179  | 2.588806  |
| 3.108024  | 5.418301  | 1.175053  |
| 3.433667  | 4.077166  | 0.740491  |
| 2.971067  | 2.986448  | 1.450812  |
| 2.646891  | 1.649298  | 0.799970  |
| 1.310319  | 1.322594  | 1.448378  |
| 0.210892  | 0.866100  | 0.736869  |
| -1.125983 | 1.144379  | 1.173421  |
| -2.088615 | 1.093509  | -0.000019 |
| -3.233536 | 2.214056  | 0.000061  |
| -2.487480 | 6.777072  | 0.698638  |
| -3.474872 | 4.511317  | -0.726884 |
| 0.456138  | 4.800452  | 3.478392  |
| 5.948119  | -2.635237 | -3.492962 |
| 4.603574  | -2.319496 | -3.040193 |
| 4.300989  | -1.027434 | -2.590926 |
| 5.327047  | -0.001007 | -2.590763 |
| 6.619165  | -0.303113 | -3.040086 |
| 6.935373  | -1.647582 | -3.492829 |
| 6.263018  | -3.978810 | -3.041315 |
| 5.111987  | -4.486954 | -2.312926 |
| 4.090925  | -3.456889 | -2.315609 |
| 3.302559  | -3.246542 | -1.176073 |
| 3.451220  | -0.815137 | -1.450374 |
| 5.114308  | 0.848809  | -1.450173 |
| 6.203493  | 1.315931  | -0.740017 |
| 7.545733  | 0.998131  | -1.175939 |
| 7.756396  | 0.209908  | -2.315464 |
| 8.786782  | -0.810824 | -2.312795 |
| 8.279064  | -1.962011 | -3.041222 |
| 8.583701  | -3.254932 | -2.604605 |
| 7.556018  | -4.282988 | -2.604639 |
| 5.301017  | -5.280949 | -1.176956 |
| 6.640921  | -5.599563 | -0.727910 |
| 7.748761  | -5.109178 | -1.426819 |
| 8.895075  | -4.593943 | -0.698982 |
| 9.409953  | -3.447431 | -1.426799 |

|           |           |           |
|-----------|-----------|-----------|
| 9.899904  | -2.339435 | -0.727854 |
| 9.580887  | -0.999609 | -1.176854 |
| 9.375465  | -0.171175 | 0.000050  |
| 8.372907  | 0.800943  | 0.000049  |
| 3.778140  | 0.521247  | -0.800365 |
| 6.619103  | -0.303170 | 3.040127  |
| 5.326994  | -0.001057 | 2.590782  |
| 4.300935  | -1.027483 | 2.590904  |
| 4.603511  | -2.319552 | 3.040152  |
| 5.948046  | -2.635302 | 3.492944  |
| 8.279001  | -1.962068 | 3.041267  |
| 8.786734  | -0.810867 | 2.312871  |
| 7.756348  | 0.209864  | 2.315537  |
| 7.545709  | 0.998109  | 1.176022  |
| 6.203478  | 1.315916  | 0.740078  |
| 5.114279  | 0.848780  | 1.450202  |
| 3.451188  | -0.815160 | 1.450337  |
| 2.984350  | -1.904416 | 0.740169  |
| 3.302536  | -3.246562 | 1.175987  |
| 4.090878  | -3.456931 | 2.315536  |
| 5.111939  | -4.486997 | 2.312857  |
| 6.262954  | -3.978866 | 3.041280  |
| 7.555964  | -4.283037 | 2.604626  |
| 8.583647  | -3.254981 | 2.604633  |
| 9.580863  | -0.999631 | 1.176944  |
| 9.899889  | -2.339449 | 0.727926  |
| 9.409923  | -3.447458 | 1.426840  |
| 8.895060  | -4.593957 | 0.698992  |
| 7.748731  | -5.109205 | 1.426794  |
| 6.640906  | -5.599577 | 0.727853  |
| 5.300993  | -5.280971 | 1.176877  |
| 4.472495  | -5.075808 | -0.000047 |
| 3.500023  | -4.073624 | -0.000048 |
| 3.778130  | 0.521231  | 0.800360  |
| 2.984363  | -1.904404 | -0.740237 |
| 6.935300  | -1.647647 | 3.492852  |
| -6.894017 | -2.663629 | -3.467904 |
| -8.246107 | -2.361844 | -3.026787 |
| -8.570584 | -1.070353 | -2.598557 |
| -7.557206 | -0.032822 | -2.591851 |
| -6.249105 | -0.325994 | -3.000642 |
| -5.916492 | -1.666434 | -3.446409 |
| -6.565251 | -4.009528 | -3.027264 |
| -7.706847 | -4.532891 | -2.305191 |
| -8.746459 | -3.513837 | -2.304906 |
| -9.551146 | -3.336611 | -1.174636 |

|           |           |           |
|-----------|-----------|-----------|
| -9.408958 | -0.885412 | -1.425248 |
| -7.765408 | 0.789639  | -1.424875 |
| -6.655327 | 1.280381  | -0.725235 |
| -5.315149 | 1.018615  | -1.176171 |
| -5.116014 | 0.207174  | -2.276529 |
| -4.058886 | -0.828985 | -2.276810 |
| -4.569589 | -1.972376 | -3.001076 |
| -4.250211 | -3.274472 | -2.592821 |
| -5.267429 | -4.308225 | -2.599367 |
| -7.513319 | -5.334143 | -1.175161 |
| -6.167895 | -5.644169 | -0.727342 |
| -5.065536 | -5.143033 | -1.426310 |
| -3.922270 | -4.621772 | -0.698799 |
| -3.423414 | -3.466588 | -1.426050 |
| -2.954864 | -2.347126 | -0.726181 |
| -3.243815 | -1.012222 | -1.176423 |
| -3.208048 | -0.048090 | -0.000085 |
| -4.351203 | 1.073302  | 0.000115  |
| -8.910294 | 0.267768  | -0.697513 |
| -6.248341 | -0.326786 | 3.001062  |
| -7.556541 | -0.033503 | 2.592710  |
| -8.569917 | -1.071034 | 2.599403  |
| -8.245324 | -2.362640 | 3.027195  |
| -6.893134 | -2.664539 | 3.467903  |
| -4.568814 | -1.973163 | 3.000673  |
| -4.058289 | -0.829585 | 2.276600  |
| -5.115415 | 0.206571  | 2.276792  |
| -5.314815 | 1.018336  | 1.176729  |
| -6.655133 | 1.280195  | 0.726210  |
| -7.765037 | 0.789275  | 1.425989  |
| -9.408582 | -0.885787 | 1.426348  |
| -9.887558 | -1.997930 | 0.727315  |
| -9.550844 | -3.336920 | 1.175132  |
| -8.745865 | -3.514443 | 2.305146  |
| -7.706260 | -4.533505 | 2.304904  |
| -6.564478 | -4.010335 | 3.026829  |
| -5.266772 | -4.308911 | 2.598511  |
| -4.249556 | -3.275154 | 2.591976  |
| -3.243563 | -1.012566 | 1.175905  |
| -2.954688 | -2.347322 | 0.725244  |
| -3.423066 | -3.466967 | 1.424952  |
| -3.922082 | -4.621975 | 0.697528  |
| -5.065175 | -5.143416 | 1.425189  |
| -6.167711 | -5.644366 | 0.726369  |
| -7.513021 | -5.334454 | 1.174611  |
| -8.345470 | -5.143713 | -0.000144 |

|           |           |           |
|-----------|-----------|-----------|
| -9.343943 | -4.165159 | 0.000113  |
| -8.910098 | 0.267575  | 0.698784  |
| -9.887746 | -1.997740 | -0.726381 |
| -5.915618 | -1.667337 | 3.446404  |

**Table S10. Cartesian coordinates of *cyclic* (C<sub>60</sub>)<sub>3</sub>**

|          |           |           |
|----------|-----------|-----------|
| 2.015878 | 0.168146  | -0.397038 |
| 1.978130 | -0.755519 | -1.619769 |
| 2.992389 | -0.824050 | -2.585072 |
| 4.281523 | -0.121492 | -2.414544 |
| 4.510052 | 0.602657  | -1.267283 |
| 3.404785 | 0.942339  | -0.301762 |
| 1.582091 | -0.783247 | 0.679057  |
| 0.742656 | -1.896339 | 0.125052  |
| 1.304787 | -1.961327 | -1.272399 |
| 1.557658 | -3.166101 | -1.904249 |
| 3.281871 | -2.070952 | -3.243006 |
| 5.329264 | -0.962463 | -2.950711 |
| 6.575878 | -1.039253 | -2.312412 |
| 6.800030 | -0.290554 | -1.097293 |
| 5.764940 | 0.498504  | -0.579194 |
| 5.500068 | 0.516819  | 0.849157  |
| 4.082885 | 0.652211  | 1.048551  |
| 3.488819 | -0.112695 | 2.049910  |
| 2.207698 | -0.827027 | 1.870067  |
| 0.720769 | -3.257710 | 0.961413  |
| 1.618942 | -3.234704 | 2.206470  |
| 2.243437 | -2.074888 | 2.652802  |
| 3.534785 | -2.118609 | 3.294474  |
| 4.287248 | -0.923941 | 2.935952  |
| 5.676768 | -0.986598 | 2.786395  |
| 6.296215 | -0.260403 | 1.706770  |
| 7.363917 | -1.080788 | 1.169437  |
| 7.611974 | -1.098640 | -0.205477 |
| 4.713046 | -2.165902 | -3.470929 |
| 7.321156 | -4.749711 | -0.685094 |
| 6.694966 | -4.713223 | -1.936777 |
| 5.437496 | -5.408249 | -2.137311 |
| 4.850713 | -6.119334 | -1.083178 |
| 5.498367 | -6.151487 | 0.216773  |
| 6.930931 | -4.721807 | 1.630793  |
| 7.681948 | -3.529347 | 1.287951  |
| 7.925854 | -3.546884 | -0.144289 |
| 7.891610 | -2.354826 | -0.876128 |
| 7.247791 | -2.316888 | -2.179089 |

|           |           |           |
|-----------|-----------|-----------|
| 6.654532  | -3.474651 | -2.694578 |
| 4.615409  | -4.594796 | -3.012318 |
| 3.240607  | -4.510750 | -2.795667 |
| 2.629033  | -5.244477 | -1.701526 |
| 3.419480  | -6.042797 | -0.865459 |
| 3.178882  | -6.026686 | 0.557964  |
| 4.461878  | -6.093952 | 1.232541  |
| 4.668056  | -5.360951 | 2.403088  |
| 5.929035  | -4.662402 | 2.607014  |
| 7.404712  | -2.318898 | 1.933597  |
| 6.362849  | -2.257824 | 2.937504  |
| 5.639274  | -3.408971 | 3.270086  |
| 4.202074  | -3.335401 | 3.471064  |
| 3.604302  | -4.538013 | 2.946990  |
| 2.355802  | -4.467940 | 2.302118  |
| 2.150196  | -5.226283 | 1.078965  |
| 1.311325  | -4.449783 | 0.212544  |
| 1.576974  | -4.429597 | -1.142635 |
| 5.367033  | -3.396214 | -3.357040 |
| 2.564569  | -3.232711 | -2.914029 |
| 6.709114  | -5.478268 | 0.410736  |
| 1.281639  | 1.585773  | -0.183098 |
| 0.771674  | 1.960855  | 1.211684  |
| 1.492446  | 2.760775  | 2.103547  |
| 2.719137  | 3.477777  | 1.703038  |
| 3.152927  | 3.389795  | 0.403966  |
| 2.633443  | 2.339961  | -0.536647 |
| 0.053286  | 1.823784  | -0.994277 |
| -1.186682 | 1.658109  | -0.182730 |
| -0.655184 | 2.002480  | 1.211998  |
| -1.327560 | 2.843255  | 2.104101  |
| 0.807133  | 3.605015  | 3.039021  |
| 2.746261  | 4.751628  | 2.376969  |
| 3.219918  | 5.892449  | 1.710514  |
| 3.663181  | 5.785398  | 0.339721  |
| 3.612712  | 4.540653  | -0.302844 |
| 3.167278  | 4.419571  | -1.680653 |
| 2.482401  | 3.158778  | -1.841066 |
| 1.301482  | 3.170611  | -2.591696 |
| 0.071928  | 2.466503  | -2.173074 |
| -2.492079 | 2.490045  | -0.535770 |
| -2.293682 | 3.298686  | -1.840086 |
| -1.114475 | 3.241346  | -2.591281 |
| -0.601829 | 4.404579  | -3.275500 |
| 0.857492  | 4.361863  | -3.275729 |
| 1.589909  | 5.550913  | -3.189947 |



|           |           |           |
|-----------|-----------|-----------|
| 2.766223  | 5.584117  | -2.358595 |
| 2.805225  | 6.874270  | -1.693126 |
| 3.246335  | 6.977965  | -0.371222 |
| 1.564941  | 4.834361  | 3.210602  |
| 0.253533  | 8.655179  | 1.000078  |
| 0.234649  | 8.000928  | 2.237961  |
| -0.962385 | 7.303768  | 2.672662  |
| -2.100809 | 7.290280  | 1.858007  |
| -2.078055 | 7.965227  | 0.570292  |
| -0.476467 | 8.512531  | -1.227913 |
| 0.973233  | 8.470162  | -1.228193 |
| 1.425476  | 8.561813  | 0.149448  |
| 2.540647  | 7.830077  | 0.569414  |
| 2.524408  | 7.154960  | 1.857136  |
| 1.389012  | 7.234968  | 2.672228  |
| -0.548690 | 6.097765  | 3.364705  |
| -1.278265 | 4.917547  | 3.211115  |
| -2.462787 | 4.904036  | 2.378020  |
| -2.869054 | 6.070615  | 1.711639  |
| -3.318237 | 5.989694  | 0.340966  |
| -2.832616 | 7.155842  | -0.370108 |
| -2.398783 | 7.026565  | -1.692169 |
| -1.199560 | 7.723944  | -2.131120 |
| 1.648667  | 7.640603  | -2.131629 |
| 0.899018  | 6.821886  | -3.060679 |
| -0.499360 | 6.862784  | -3.060376 |
| -1.263415 | 5.634407  | -3.189358 |
| -2.435442 | 5.736337  | -2.357568 |
| -2.903687 | 4.597263  | -1.679514 |
| -3.340903 | 4.744151  | -0.301593 |
| -2.949006 | 3.568370  | 0.405099  |
| -2.510371 | 3.630779  | 1.704036  |
| 0.905722  | 6.055221  | 3.364455  |
| -0.593722 | 3.645975  | 3.039319  |
| -0.922151 | 8.630489  | 0.149902  |
| -0.852292 | -1.849571 | 0.125121  |
| -1.417265 | -1.881361 | -1.272398 |
| -1.740124 | -3.069230 | -1.904378 |
| -1.833340 | -4.329541 | -1.142906 |
| -1.569415 | -4.365333 | 0.212280  |
| -0.910181 | -3.210005 | 0.961410  |
| -1.625084 | -0.689322 | 0.679330  |
| -2.002555 | 0.285926  | -0.396649 |
| -2.018964 | -0.638175 | -1.619519 |
| -3.035502 | -0.647171 | -2.584821 |
| -2.749259 | -3.076689 | -2.914131 |

|           |           |           |
|-----------|-----------|-----------|
| -2.931331 | -5.081396 | -1.701883 |
| -3.767217 | -5.832113 | -0.865930 |
| -3.526136 | -5.830207 | 0.557465  |
| -2.452356 | -5.091530 | 1.078563  |
| -2.613294 | -4.322641 | 2.301769  |
| -1.805526 | -3.134642 | 2.206360  |
| -2.361049 | -1.940382 | 2.652935  |
| -2.252357 | -0.696722 | 1.870273  |
| -3.343857 | 1.139944  | -0.301199 |
| -4.037775 | 0.889777  | 1.049017  |
| -3.489520 | 0.091218  | 2.050214  |
| -4.334087 | -0.671957 | 2.936163  |
| -3.652780 | -1.908609 | 3.294651  |
| -4.390130 | -3.084313 | 3.471005  |
| -3.863700 | -4.319736 | 2.946734  |
| -4.973794 | -5.078975 | 2.402762  |
| -4.810824 | -5.822557 | 1.232081  |
| -3.498871 | -4.313015 | -2.795963 |
| -7.586412 | -4.313090 | -0.685453 |
| -6.959184 | -4.313115 | -1.937156 |
| -6.846426 | -3.078972 | -2.694820 |
| -7.370973 | -1.888594 | -2.179085 |
| -8.015959 | -1.888996 | -0.876111 |
| -7.875277 | -3.074011 | 1.287783  |
| -7.195416 | -4.308474 | 1.630507  |
| -7.018205 | -5.076433 | 0.410306  |
| -5.848896 | -5.819251 | 0.216280  |
| -5.200439 | -5.824738 | -1.083657 |
| -5.744548 | -5.080474 | -2.137768 |
| -5.556495 | -3.075889 | -3.357336 |
| -4.831667 | -1.885900 | -3.470924 |
| -5.376490 | -0.648581 | -2.950465 |
| -6.625406 | -0.652485 | -2.312094 |
| -6.805442 | 0.107929  | -1.096949 |
| -7.663476 | -0.651294 | -0.205303 |
| -7.414696 | -0.648179 | 1.169620  |
| -7.527772 | -1.881920 | 1.933589  |
| -6.191763 | -4.307892 | 2.606747  |
| -5.829136 | -3.073608 | 3.269893  |
| -6.484099 | -1.882043 | 2.937462  |
| -5.724896 | -0.653099 | 2.786601  |
| -6.300776 | 0.108265  | 1.707071  |
| -5.460458 | 0.837624  | 0.849591  |
| -5.725899 | 0.834908  | -0.578740 |
| -4.467058 | 0.865636  | -1.266809 |
| -4.281329 | 0.129573  | -2.414215 |

|           |           |           |
|-----------|-----------|-----------|
| -4.876232 | -4.316411 | -3.012646 |
| -3.397413 | -1.874913 | -3.242899 |
| -8.119726 | -3.077085 | -0.144440 |

**Table S11. Atomic contributions to the mean polarizability of (C<sub>60</sub>)<sub>3</sub> isomers**

| №  | Distributed polarizability of atoms (a.u.) |                |                |                |          |               |
|----|--------------------------------------------|----------------|----------------|----------------|----------|---------------|
|    | <i>trans-1</i>                             | <i>trans-2</i> | <i>trans-3</i> | <i>trans-4</i> | <i>e</i> | <i>cyclic</i> |
| 1  | 21.1728                                    | 16.1401        | 18.3407        | 9.6191         | 7.3314   | 0.0485        |
| 2  | 18.6633                                    | 14.0363        | 16.2221        | 6.8774         | 8.2509   | -1.0437       |
| 3  | 21.1698                                    | 18.2115        | 18.5086        | 10.1747        | 13.4116  | 3.3931        |
| 4  | 25.4288                                    | 22.5474        | 22.1176        | 14.1515        | 16.3050  | 3.4507        |
| 5  | 25.4312                                    | 27.8407        | 27.3125        | 20.7483        | 14.7228  | 1.7942        |
| 6  | 28.8445                                    | 25.9142        | 26.3094        | 19.3135        | 12.4355  | 0.8234        |
| 7  | 26.0529                                    | 12.9082        | 15.5641        | 7.8156         | 5.0978   | -1.5960       |
| 8  | 16.2858                                    | 8.1012         | 10.9382        | 3.9601         | 3.9881   | 0.0240        |
| 9  | 15.1607                                    | 9.2853         | 11.6448        | 3.0094         | 3.8930   | -1.0186       |
| 10 | 10.1485                                    | 1.6787         | 3.5282         | -3.0036        | 5.0157   | 2.1183        |
| 11 | 3.2797                                     | 15.1056        | 15.1896        | 7.1486         | 14.0186  | 6.4986        |
| 12 | 4.9056                                     | 21.9728        | 20.6838        | 14.9136        | 17.9454  | 9.0608        |
| 13 | 3.2785                                     | 26.1404        | 23.0247        | 21.9275        | 20.1879  | 14.3882       |
| 14 | 10.1513                                    | 28.6581        | 25.4791        | 24.7911        | 19.3197  | 13.7748       |
| 15 | 15.1674                                    | 29.8512        | 28.5677        | 24.1163        | 16.4192  | 5.4526        |
| 16 | 16.3032                                    | 29.2139        | 28.1617        | 24.6489        | 13.2996  | 5.3153        |
| 17 | 26.0661                                    | 26.7538        | 26.8206        | 21.8040        | 11.1756  | 1.2171        |
| 18 | 28.8472                                    | 18.7243        | 19.9197        | 17.5064        | 4.9463   | 0.5884        |
| 19 | 30.5146                                    | 14.7700        | 16.7213        | 13.0965        | 3.7939   | 2.2413        |
| 20 | 30.5144                                    | -2.3624        | 0.1366         | -0.5082        | 1.3271   | 0.8817        |
| 21 | 28.8445                                    | -1.9700        | 0.3793         | 1.0629         | 0.5962   | 2.1395        |
| 22 | 26.0545                                    | 10.3511        | 12.3338        | 11.3180        | 2.4433   | 1.3334        |
| 23 | 16.2848                                    | 13.0722        | 14.0044        | 14.4410        | 0.3907   | 5.6347        |
| 24 | 12.3535                                    | 18.0699        | 18.6850        | 18.4197        | 3.5673   | 5.1903        |
| 25 | 12.3539                                    | 23.3631        | 21.6823        | 24.4865        | 7.3355   | 11.7439       |
| 26 | 7.6949                                     | 26.8659        | 24.7557        | 26.5612        | 12.0078  | 12.2820       |
| 27 | -3.6662                                    | 26.3333        | 23.3746        | 26.7225        | 13.6761  | 15.8719       |
| 28 | -9.3855                                    | 27.5814        | 23.8885        | 25.6245        | 18.9491  | 17.1889       |
| 29 | -3.1314                                    | 17.3898        | 16.4356        | 10.7800        | 16.8238  | 8.8145        |
| 30 | -3.1342                                    | 11.2663        | 7.6318         | 14.6153        | 14.7415  | 22.8869       |
| 31 | -9.3860                                    | 9.3886         | 6.4083         | 8.5082         | 16.3222  | 21.0484       |
| 32 | -3.6603                                    | 4.9830         | 2.8064         | 1.1137         | 13.4206  | 18.2560       |
| 33 | 7.7139                                     | -4.0655        | -4.3152        | -4.8666        | 8.2651   | 17.8535       |
| 34 | 12.3849                                    | -3.6795        | -4.0429        | 0.4631         | 7.3581   | 19.1173       |
| 35 | 12.3849                                    | 10.6401        | 7.7076         | 15.7265        | 11.1939  | 22.1835       |
| 36 | 16.3025                                    | 15.3987        | 11.8818        | 19.1908        | 13.3064  | 22.1096       |
| 37 | 26.0684                                    | 15.4937        | 11.6490        | 19.0482        | 16.4251  | 23.0228       |
| 38 | 28.8469                                    | 24.1293        | 20.1337        | 23.1239        | 19.3182  | 19.3396       |

|    |         |         |         |         |         |         |
|----|---------|---------|---------|---------|---------|---------|
| 39 | 25.4232 | 23.2893 | 19.6018 | 20.9574 | 20.1864 | 18.1825 |
| 40 | 25.4256 | 12.8675 | 9.9740  | 9.6738  | 17.9464 | 18.3284 |
| 41 | 21.1532 | 6.7746  | 5.1795  | 1.3943  | 14.0213 | 16.1717 |
| 42 | 15.1488 | 0.8846  | 1.4750  | -5.8793 | 8.1696  | 8.2580  |
| 43 | 10.1402 | -3.6463 | -2.1706 | 0.2154  | 5.0142  | 7.9702  |
| 44 | 7.6924  | -8.5643 | -7.4039 | 0.6007  | 3.8941  | 13.7414 |
| 45 | -3.6629 | 0.2552  | 0.1029  | -4.8800 | 3.9901  | 13.3109 |
| 46 | -9.3847 | -8.6134 | -7.3815 | -0.2065 | 5.1096  | 16.8757 |
| 47 | 0.3189  | -1.1602 | -0.5428 | 8.1540  | 3.7956  | 16.0512 |
| 48 | 0.3179  | 5.3205  | 4.3264  | 12.5611 | 4.9489  | 17.8398 |
| 49 | -9.3849 | 22.5808 | 19.7030 | 24.8517 | 12.0026 | 17.9146 |
| 50 | -3.6576 | 20.7625 | 18.7187 | 23.4580 | 7.3322  | 15.2644 |
| 51 | 7.7114  | 7.5483  | 6.9037  | 14.8648 | 3.5662  | 15.3998 |
| 52 | 10.1444 | 6.0910  | 6.2836  | 12.2566 | 0.3907  | 12.1584 |
| 53 | 15.1552 | -1.3774 | -1.0236 | 8.1651  | 2.4424  | 12.7487 |
| 54 | 21.1502 | -7.9660 | -5.7314 | 0.9005  | 0.5932  | 6.1043  |
| 55 | 18.6335 | 0.5242  | 0.6570  | -3.2696 | 1.3257  | 5.4708  |
| 56 | 4.8804  | -7.9021 | -5.7025 | -3.0422 | -0.0118 | 1.2245  |
| 57 | 3.2662  | -3.8167 | -2.5604 | -5.9103 | 0.7994  | 1.9351  |
| 58 | -3.1344 | 11.3273 | 9.2539  | 7.3087  | 16.8236 | 16.2238 |
| 59 | -3.1379 | 2.5879  | 3.7796  | -2.2578 | 8.1730  | 6.1519  |
| 60 | 3.2647  | 7.2819  | 4.3404  | 12.0043 | 12.4607 | 22.9303 |
| 61 | 3.2377  | 7.4188  | 10.8221 | 3.0864  | 8.9057  | -0.0169 |
| 62 | 4.8599  | 7.8528  | 12.4168 | 4.0477  | 5.0309  | -1.1285 |
| 63 | 3.2382  | 6.3100  | 9.5787  | 7.7075  | -0.5587 | 2.2264  |
| 64 | -3.1233 | 5.7282  | 7.7555  | 7.7161  | 0.3425  | 1.9687  |
| 65 | -3.1267 | 4.8588  | 5.8712  | 4.0529  | 10.0791 | 1.4019  |
| 66 | -9.3597 | 5.4407  | 7.0772  | 3.0853  | 12.9652 | 0.9235  |
| 67 | -3.6980 | 8.7252  | 12.1671 | 3.5225  | 10.8887 | -1.7824 |
| 68 | 7.6727  | 9.9980  | 14.0211 | 0.2010  | 8.3351  | -0.0129 |
| 69 | 10.1037 | 9.1350  | 13.9864 | 4.3506  | 4.7512  | -1.1287 |
| 70 | 15.1264 | 9.9854  | 15.4799 | 7.8552  | -0.7118 | 2.2126  |
| 71 | 21.1605 | 7.6152  | 10.4173 | 10.0787 | -3.5982 | 5.4296  |
| 72 | 18.5425 | 6.7914  | 6.9573  | 10.0872 | -3.5216 | 7.8599  |
| 73 | 21.1635 | 4.8817  | 4.8089  | 10.7593 | 2.8031  | 13.6795 |
| 74 | 15.1194 | 4.3172  | 3.3462  | 7.8206  | 9.2248  | 13.6538 |
| 75 | 10.1003 | 4.3269  | 4.1391  | 4.3264  | 13.2064 | 5.6114  |
| 76 | 7.6560  | 4.8998  | 4.6809  | 0.2064  | 17.1607 | 6.2541  |
| 77 | -3.6980 | 4.8912  | 4.4956  | 3.4990  | 16.4732 | 2.2825  |
| 78 | -9.3592 | 8.0114  | 7.2540  | 2.1663  | 21.2570 | 1.7754  |
| 79 | 0.3242  | 8.0007  | 8.9258  | 2.1617  | 19.4987 | 2.9552  |
| 80 | 0.3232  | 11.9889 | 15.2577 | 0.5953  | 11.1747 | 0.9282  |
| 81 | -9.3608 | 11.5362 | 13.8102 | 5.4416  | 15.2842 | 2.2690  |
| 82 | -3.6967 | 8.6107  | 9.3342  | 1.9558  | 20.8739 | 1.7775  |
| 83 | 7.6748  | 8.6744  | 7.6337  | 3.2262  | 23.4553 | 6.4554  |
| 84 | 12.3524 | 0.7310  | 0.8810  | 1.9510  | 23.7580 | 6.4515  |
| 85 | 12.3518 | 0.4735  | 0.2490  | 5.4275  | 24.4883 | 12.8248 |

|     |         |         |         |         |         |         |
|-----|---------|---------|---------|---------|---------|---------|
| 86  | 16.2760 | 6.8488  | 4.3610  | 0.6020  | 22.3475 | 13.1779 |
| 87  | 26.0954 | 5.7220  | 2.8544  | 6.1723  | 21.0357 | 16.6320 |
| 88  | 28.9442 | 4.8566  | 2.8536  | 7.4430  | 11.0002 | 17.1439 |
| 89  | 25.4400 | 0.4788  | 6.5418  | 12.2205 | 0.4493  | 7.7042  |
| 90  | 25.4423 | 8.7016  | 4.5054  | 16.8387 | 10.0997 | 22.7961 |
| 91  | 28.9403 | 7.9852  | 7.2886  | 17.4188 | 0.3462  | 20.3323 |
| 92  | 26.0802 | 8.6005  | 8.9400  | 17.4162 | -0.5570 | 17.6665 |
| 93  | 16.2605 | 11.5404 | 12.1678 | 16.8465 | 5.0534  | 17.6033 |
| 94  | 12.3207 | 11.9751 | 10.8397 | 16.4357 | 8.9343  | 19.2420 |
| 95  | 12.3210 | 9.1046  | 5.8926  | 14.7791 | 16.4936 | 22.5315 |
| 96  | 7.6565  | 7.8221  | 4.1522  | 13.3322 | 17.1674 | 22.5338 |
| 97  | -3.7050 | 7.4063  | 4.6837  | 14.4323 | 13.2121 | 22.9984 |
| 98  | -9.3603 | 5.4247  | 4.3800  | 12.1138 | 9.2239  | 19.2435 |
| 99  | -3.1199 | 4.8768  | 0.2403  | 12.6461 | 2.7999  | 17.6140 |
| 100 | -3.1237 | 7.9581  | 0.8734  | 16.5938 | -3.5252 | 17.6598 |
| 101 | 3.2505  | 8.6228  | 9.3462  | 16.5821 | -3.5993 | 15.3448 |
| 102 | 10.1110 | 8.3100  | 13.8033 | 12.6571 | -2.8754 | 7.7039  |
| 103 | 15.1383 | 10.8864 | 15.2588 | 12.1178 | -0.7132 | 7.8521  |
| 104 | 16.2773 | 11.9953 | 14.0134 | 14.4237 | 4.7536  | 13.6654 |
| 105 | 26.0935 | 12.9973 | 13.9965 | 13.3304 | 8.3411  | 13.6209 |
| 106 | 28.9437 | 12.5653 | 12.4444 | 14.7749 | 10.9061 | 17.1185 |
| 107 | 30.5856 | 11.0500 | 9.5943  | 11.1315 | 19.5109 | 16.6179 |
| 108 | 30.5845 | 9.9836  | 7.7780  | 11.1372 | 21.2706 | 18.5257 |
| 109 | 28.9332 | 6.3193  | 3.3430  | 7.8421  | 22.3461 | 18.5263 |
| 110 | 26.0780 | 7.6641  | 4.7841  | 6.6871  | 24.4864 | 16.1850 |
| 111 | 16.2615 | 8.4248  | 6.9357  | 8.8941  | 23.7595 | 16.1795 |
| 112 | 15.1316 | 8.3402  | 6.5298  | 6.7457  | 23.4560 | 12.8207 |
| 113 | 10.1083 | 10.9010 | 10.4237 | 8.8865  | 20.8758 | 13.1654 |
| 114 | 3.2516  | 11.9798 | 13.4742 | 6.6890  | 15.2818 | 6.2378  |
| 115 | 4.8841  | 13.0067 | 15.4816 | 7.8489  | 11.1759 | 5.5872  |
| 116 | 18.5719 | 12.5758 | 16.1664 | 6.2093  | 8.6783  | 1.3853  |
| 117 | 21.1802 | 11.0427 | 16.1637 | 7.4736  | -0.2096 | 1.9679  |
| 118 | 25.4455 | 0.7398  | 7.6887  | 16.0947 | 0.4496  | 15.3447 |
| 119 | 25.4479 | 8.3940  | 13.4691 | 10.7627 | -2.8735 | 5.4354  |
| 120 | 21.1831 | 9.9823  | 7.0951  | 16.4409 | 12.9966 | 23.0031 |
| 121 | 7.9273  | 10.3831 | 12.3187 | 14.8567 | 15.1750 | 0.0132  |
| 122 | 8.0733  | 13.1043 | 13.9846 | 12.5496 | 18.2044 | -1.0025 |
| 123 | 7.9277  | 6.1310  | 6.2512  | 15.7211 | 17.3338 | 2.1336  |
| 124 | 7.2074  | -1.3970 | -1.0067 | 19.2454 | 13.2481 | 1.9387  |
| 125 | 7.2052  | -7.9943 | -5.6928 | 24.9134 | 5.9071  | 1.2318  |
| 126 | 8.7139  | -1.9268 | 0.3469  | 23.4870 | 5.8004  | 0.8778  |
| 127 | 7.8651  | 14.7841 | 16.7084 | 12.2348 | 15.6062 | -1.6003 |
| 128 | 8.2720  | 18.7095 | 19.9777 | 8.1504  | 19.0343 | 0.0508  |
| 129 | 8.0777  | 18.0681 | 18.7016 | 8.1453  | 20.8562 | -1.0384 |
| 130 | 8.0666  | 23.3079 | 21.7171 | -0.2259 | 24.9915 | 3.3928  |
| 131 | 7.9411  | 7.5557  | 6.8870  | 11.9920 | 18.9903 | 6.1538  |
| 132 | 8.0697  | -1.1606 | -0.5201 | 19.0827 | 12.7493 | 7.9727  |

|     |        |         |         |         |         |         |
|-----|--------|---------|---------|---------|---------|---------|
| 133 | 7.9415 | -8.6329 | -7.3528 | 23.1962 | 2.7635  | 13.7448 |
| 134 | 8.0628 | 0.2441  | 0.1074  | 25.7172 | -2.4239 | 13.3179 |
| 135 | 8.0738 | 0.5110  | 0.6722  | 26.8356 | -0.2128 | 5.4779  |
| 136 | 8.2559 | -7.9300 | -5.6709 | 26.6031 | 0.3766  | 6.1080  |
| 137 | 7.8591 | -2.3298 | 0.0965  | 24.5107 | 3.1906  | 2.1438  |
| 138 | 8.7149 | 8.1066  | 10.9241 | 18.4130 | 4.7571  | 1.3261  |
| 139 | 0.6126 | 12.9194 | 15.5589 | 14.4256 | 8.2132  | 2.2319  |
| 140 | 0.6121 | 26.6998 | 26.9075 | 0.8897  | 19.4371 | 0.8256  |
| 141 | 8.7117 | 25.8653 | 26.3727 | 1.0656  | 15.8535 | 1.2390  |
| 142 | 7.8628 | 16.1205 | 18.3881 | 11.2838 | 7.9756  | 0.6011  |
| 143 | 8.2750 | 14.0493 | 16.2322 | 13.0966 | 4.4388  | 5.1887  |
| 144 | 8.5259 | 9.2844  | 11.6506 | 17.4885 | 1.8579  | 5.6513  |
| 145 | 8.5252 | 1.6846  | 3.5310  | 21.8142 | -3.2325 | 12.1631 |
| 146 | 8.2704 | -3.8242 | -2.5426 | 24.6655 | -4.6764 | 12.7529 |
| 147 | 7.8756 | -3.6678 | -2.1482 | 24.1786 | 0.0456  | 16.0641 |
| 148 | 8.7883 | -8.5871 | -7.3826 | 24.8476 | 0.7510  | 16.8857 |
| 149 | 7.2319 | 5.3515  | 4.2975  | 14.6076 | 16.6961 | 8.2676  |
| 150 | 7.2359 | 9.4270  | 6.4045  | 10.7653 | 5.9225  | 22.8318 |
| 151 | 8.7882 | 11.3190 | 7.6177  | 7.2878  | 13.2524 | 21.0401 |
| 152 | 7.8677 | 15.5426 | 11.6090 | 1.4215  | 17.3446 | 18.3255 |
| 153 | 8.2543 | 24.1366 | 20.1246 | -5.8478 | 18.2190 | 18.1422 |
| 154 | 8.4951 | 23.2905 | 19.5934 | -2.2652 | 15.1997 | 19.2839 |
| 155 | 8.4955 | 11.3647 | 9.2347  | 10.1655 | 3.2055  | 22.0619 |
| 156 | 8.2586 | 6.7891  | 5.1673  | 14.1366 | 0.3771  | 22.1591 |
| 157 | 7.8561 | 5.0130  | 2.7924  | 14.9111 | -0.2078 | 22.9103 |
| 158 | 8.7135 | -4.0391 | -4.3241 | 21.9675 | -2.4250 | 19.1409 |
| 159 | 7.2096 | -3.6473 | -4.0502 | 20.9421 | 2.7603  | 17.8625 |
| 160 | 7.2058 | 7.3331  | 4.3246  | 9.6880  | 12.7512 | 18.2525 |
| 161 | 7.9426 | 15.4396 | 11.8366 | 1.1398  | 18.9880 | 16.2063 |
| 162 | 8.0886 | 22.5665 | 19.6910 | -4.8352 | 24.5680 | 8.8262  |
| 163 | 8.0775 | 26.2858 | 23.3859 | 0.6112  | 24.9853 | 9.0685  |
| 164 | 8.2734 | 27.5073 | 23.9199 | 0.2195  | 20.8654 | 14.3679 |
| 165 | 7.8729 | 28.6185 | 25.5085 | -5.8995 | 19.0442 | 13.7533 |
| 166 | 8.7866 | 26.0997 | 23.0531 | -3.0134 | 15.6295 | 17.1540 |
| 167 | 0.6039 | 21.9815 | 20.6809 | 2.9968  | 8.2199  | 15.8542 |
| 168 | 0.6039 | 17.3818 | 16.4494 | 6.8724  | 4.7618  | 17.8732 |
| 169 | 8.7860 | 0.8912  | 1.4836  | 20.7494 | -4.6787 | 17.8459 |
| 170 | 7.8653 | 2.5902  | 3.7950  | 19.3034 | -3.2320 | 15.4090 |
| 171 | 8.2573 | 15.1591 | 15.1635 | 9.5936  | 1.8567  | 15.2589 |
| 172 | 8.0736 | 18.2033 | 18.5431 | 7.8031  | 4.4411  | 11.7712 |
| 173 | 8.0847 | 22.5540 | 22.1536 | 3.9528  | 7.9738  | 12.2569 |
| 174 | 7.9434 | 27.7772 | 27.3897 | -0.5100 | 15.8587 | 5.3327  |
| 175 | 8.0995 | 29.7970 | 28.6292 | -3.0305 | 19.4361 | 5.4796  |
| 176 | 8.0956 | 29.1053 | 28.2734 | -3.2662 | 21.3828 | 1.8067  |
| 177 | 7.9564 | 26.7957 | 24.8104 | -4.8501 | 25.4309 | 3.4589  |
| 178 | 7.2324 | 10.7118 | 7.6500  | 8.4824  | 16.6920 | 16.1845 |
| 179 | 7.2374 | 20.8272 | 18.6575 | 0.4375  | 24.5707 | 6.4954  |

|     |        |         |        |        |        |         |
|-----|--------|---------|--------|--------|--------|---------|
| 180 | 7.9572 | 12.9055 | 9.9428 | 7.1358 | 5.8258 | 22.9494 |
|-----|--------|---------|--------|--------|--------|---------|

**Table S12. Atomic contributions to the mean polarizability of C<sub>60</sub> and isomeric structures C<sub>120</sub>**

| №  | Distributed polarizability of atoms (a.u.) |                                 |                         |                            |
|----|--------------------------------------------|---------------------------------|-------------------------|----------------------------|
|    | C <sub>60</sub>                            | (C <sub>60</sub> ) <sub>2</sub> | Peanut C <sub>120</sub> | Fullerene C <sub>120</sub> |
| 1  | 9.0447                                     | 11.7673                         | 19.7919                 | 13.1433                    |
| 2  | 9.0492                                     | 12.3958                         | 19.7884                 | 13.1278                    |
| 3  | 9.0447                                     | 17.3076                         | 18.3656                 | 6.8822                     |
| 4  | 9.0453                                     | 18.7578                         | 17.2407                 | 5.8264                     |
| 5  | 9.0384                                     | 17.0624                         | 18.3658                 | 5.8176                     |
| 6  | 9.0342                                     | 14.7038                         | 14.6122                 | 5.5425                     |
| 7  | 9.0441                                     | 8.7390                          | 11.1645                 | 5.5505                     |
| 8  | 9.0526                                     | 7.6481                          | 19.7919                 | 5.5402                     |
| 9  | 9.0310                                     | 10.2283                         | 19.7945                 | 5.8168                     |
| 10 | 9.0402                                     | 10.2292                         | 14.6194                 | 6.9031                     |
| 11 | 9.0450                                     | 17.3118                         | 18.3543                 | 6.8941                     |
| 12 | 9.0582                                     | 19.6617                         | 14.6038                 | 13.1400                    |
| 13 | 9.0351                                     | 19.6618                         | 11.8477                 | 15.9271                    |
| 14 | 9.0405                                     | 18.7562                         | 9.6514                  | 15.9165                    |
| 15 | 9.0330                                     | 17.0630                         | 9.6454                  | 13.1662                    |
| 16 | 9.0291                                     | 14.7087                         | 11.8529                 | 5.8327                     |
| 17 | 9.0252                                     | 13.3544                         | 14.6171                 | 5.5614                     |
| 18 | 9.0254                                     | 6.3288                          | 18.3686                 | 6.9035                     |
| 19 | 9.0239                                     | 5.3743                          | 19.7960                 | 15.9557                    |
| 20 | 9.0200                                     | 1.9515                          | 19.7949                 | 17.7890                    |
| 21 | 9.0247                                     | -0.2713                         | 17.2278                 | 15.9422                    |
| 22 | 9.0228                                     | 1.8508                          | 11.8319                 | 15.9456                    |
| 23 | 9.0213                                     | 1.8556                          | 9.1772                  | 6.8844                     |
| 24 | 9.0531                                     | 5.3745                          | 6.5552                  | 5.5494                     |
| 25 | 9.0596                                     | 8.7312                          | 11.8582                 | 5.8195                     |
| 26 | 9.0478                                     | 11.7568                         | 18.3632                 | 13.1416                    |
| 27 | 9.0410                                     | 12.3741                         | 18.3576                 | 15.9157                    |
| 28 | 9.0333                                     | 17.2975                         | 17.2401                 | 17.7189                    |
| 29 | 9.0347                                     | 18.7585                         | 6.5513                  | 13.1355                    |
| 30 | 9.0217                                     | 11.7481                         | 9.1903                  | 5.8214                     |
| 31 | 9.0167                                     | 14.6884                         | 2.8359                  | 5.5428                     |
| 32 | 9.0185                                     | 13.3287                         | 2.4351                  | 6.8919                     |
| 33 | 9.0155                                     | 6.3011                          | 2.8304                  | 15.9165                    |
| 34 | 9.0287                                     | 5.3584                          | 2.4357                  | 6.8909                     |
| 35 | 9.0263                                     | 7.6289                          | 9.6185                  | 5.5459                     |
| 36 | 9.0276                                     | 10.1973                         | 11.1360                 | 5.8198                     |
| 37 | 9.0327                                     | 12.3777                         | 14.5944                 | 13.1337                    |
| 38 | 9.0371                                     | 17.2982                         | 14.5946                 | 6.8875                     |
| 39 | 9.0530                                     | 18.7574                         | 11.1553                 | 5.5539                     |

|    |        |         |         |         |
|----|--------|---------|---------|---------|
| 40 | 9.0368 | 17.0563 | 9.6486  | 5.8241  |
| 41 | 9.0471 | 14.6854 | 9.6252  | 13.1463 |
| 42 | 9.0562 | 11.7510 | 6.5427  | 15.9439 |
| 43 | 9.0471 | 8.7280  | 6.5488  | 15.9445 |
| 44 | 9.0526 | 5.3603  | 2.4394  | 13.1325 |
| 45 | 9.0381 | 1.8505  | 1.5365  | 6.8857  |
| 46 | 9.0511 | 1.8535  | 1.5360  | 5.5492  |
| 47 | 9.0481 | -0.2668 | 1.5344  | 5.8247  |
| 48 | 9.0274 | 1.9482  | 1.5375  | 13.1430 |
| 49 | 9.0192 | 10.1977 | 2.4324  | 6.8996  |
| 50 | 9.0251 | 7.6313  | 6.5401  | 5.5472  |
| 51 | 9.0305 | 1.9458  | 9.6241  | 5.8238  |
| 52 | 9.0281 | -0.2703 | 6.5453  | 13.1351 |
| 53 | 9.0191 | 0.4365  | 11.8332 | 5.8262  |
| 54 | 9.0179 | 0.4363  | 11.8292 | 5.5488  |
| 55 | 9.0287 | -0.2689 | 9.1700  | 6.9005  |
| 56 | 9.0261 | 1.9532  | 2.8258  | 15.9128 |
| 57 | 9.0280 | 7.6454  | 2.4322  | 15.9143 |
| 58 | 9.0223 | 17.0533 | 1.5355  | 13.1563 |
| 59 | 9.0234 | 12.3948 | 1.5369  | 5.8231  |
| 60 | 9.0378 | 8.7263  | 2.4340  | 5.5536  |
| 61 |        | 18.8077 | 19.8859 | 6.8931  |
| 62 |        | 19.7034 | 19.8832 | 15.9546 |
| 63 |        | 19.7036 | 18.3889 | 15.9571 |
| 64 |        | 18.8076 | 17.2278 | 13.1482 |
| 65 |        | 17.0830 | 18.3999 | 6.8996  |
| 66 |        | 17.0810 | 14.6297 | 5.8265  |
| 67 |        | 17.3118 | 11.1282 | 5.5529  |
| 68 |        | 17.3121 | 19.8842 | 5.8250  |
| 69 |        | 18.8123 | 19.8843 | 13.1546 |
| 70 |        | 17.0799 | 14.6102 | 5.5501  |
| 71 |        | 18.8144 | 18.3981 | 6.9087  |
| 72 |        | 17.3237 | 14.6308 | 17.7221 |
| 73 |        | 12.3933 | 11.8706 | 17.7872 |
| 74 |        | 11.7513 | 9.6431  | 17.7880 |
| 75 |        | 14.7188 | 9.6247  | 13.1467 |
| 76 |        | 13.3234 | 11.8376 | 5.8310  |
| 77 |        | 14.7148 | 14.6245 | 5.5493  |
| 78 |        | 11.7434 | 18.3916 | 6.9067  |
| 79 |        | 12.3692 | 19.8808 | 15.9311 |
| 80 |        | 12.3712 | 19.8810 | 15.9354 |
| 81 |        | 10.1832 | 17.2420 | 13.1680 |
| 82 |        | 10.1851 | 11.8666 | 5.8267  |
| 83 |        | 7.6163  | 9.1531  | 5.5587  |
| 84 |        | 8.7245  | 6.5372  | 6.9019  |



|     |  |         |         |         |
|-----|--|---------|---------|---------|
| 85  |  | 5.3635  | 11.8434 | 15.9584 |
| 86  |  | 6.3257  | 18.4006 | 15.9620 |
| 87  |  | 5.3627  | 18.3866 | 6.8951  |
| 88  |  | 8.7251  | 17.2121 | 5.5556  |
| 89  |  | 17.3261 | 6.5320  | 5.8257  |
| 90  |  | 1.9395  | 9.1322  | 13.1615 |
| 91  |  | 7.6331  | 2.8371  | 6.9050  |
| 92  |  | 8.7192  | 2.4267  | 5.5507  |
| 93  |  | 5.3474  | 2.8453  | 5.8277  |
| 94  |  | 1.8503  | 2.4333  | 13.1507 |
| 95  |  | 0.4442  | 9.6452  | 17.7958 |
| 96  |  | -0.2786 | 11.1485 | 17.7234 |
| 97  |  | 1.9365  | 14.6364 | 15.9654 |
| 98  |  | 7.6346  | 14.6208 | 6.9065  |
| 99  |  | 10.2123 | 11.1203 | 5.5635  |
| 100 |  | 10.2155 | 9.6261  | 5.8340  |
| 101 |  | 11.7362 | 9.6252  | 13.1707 |
| 102 |  | 14.6975 | 6.5311  | 13.1561 |
| 103 |  | 13.2918 | 6.5324  | 5.8326  |
| 104 |  | 6.3008  | 2.4289  | 5.5546  |
| 105 |  | 5.3485  | 1.5245  | 6.9121  |
| 106 |  | 1.8534  | 1.5275  | 20.5151 |
| 107 |  | -0.2771 | 1.5272  | 20.5077 |
| 108 |  | 0.4443  | 1.5249  | 20.5146 |
| 109 |  | 1.8540  | 2.4275  | 20.5174 |
| 110 |  | 1.8547  | 6.5423  | 17.7221 |
| 111 |  | -0.2785 | 9.6557  | 15.9315 |
| 112 |  | 1.9323  | 6.5440  | 17.7266 |
| 113 |  | 1.9355  | 11.8666 | 15.9296 |
| 114 |  | 7.6164  | 11.8434 | 20.4543 |
| 115 |  | 8.7138  | 9.1451  | 20.4582 |
| 116 |  | 11.7291 | 2.8436  | 20.4641 |
| 117 |  | 14.6992 | 2.4298  | 20.4616 |
| 118 |  | 12.3893 | 1.5260  | 20.4587 |
| 119 |  | 17.0776 | 1.5252  | 20.5158 |
| 120 |  | -0.2780 | 2.4300  | 17.7954 |
